# Supplementary material
Source: ML conference proceedings conference paper supplement (https://openreview.net/forum?id=dTj5tH94xv)
Supplement: supplementary_material [file attachment]

## 502 A Additional notations

503 In this work, matrices are written in bold uppercase letters. Vectors are written in bold lowercase  
 504 letters only if they indicate network parameters (such as bias). For a matrix  $\mathbf{A} \in \mathbb{R}^{m \times n}$ , we use  
 505  $\mathbf{A}[i, :] \in \mathbb{R}^{1 \times n}$  (resp.  $\mathbf{A}[:, i] \in \mathbb{R}^{m \times 1}$ ) to denote the row (resp. column) vector corresponding to the  
 506  $i$ th row (resp. column) of  $\mathbf{A}$ . To ease the notation, we write  $\mathbf{A}[i, :] \mathbf{v}$  to denote the scalar product  
 507 between  $\mathbf{A}[i, :]$  and the vector  $\mathbf{v} \in \mathbb{R}^n$ . This notation will be used regularly when we decompose the  
 508 functions of one-hidden-neural networks into sum of functions corresponding to hidden neurons.

509 For a vector  $v \in \mathbb{R}^d$ ,  $v[I] \in \mathbb{R}^{|I|}$  is the vector  $v$  restricted to coefficients in  $I \subseteq \llbracket d \rrbracket$ . If  $I = \{i\}$  a  
 510 singleton,  $v[i] \in \mathbb{R}$  is the  $i$ th coefficient of  $v$ . We also use  $\mathbf{1}_m$  and  $\mathbf{0}_m$  to denote an all-one (resp.  
 511 all-zero) vector of size  $m$ .

512 For a *dense* (fully connected) feedforward architecture, we denote  $\mathbf{N} = (N_L, \dots, N_0)$  the dimensions  
 513 of the input layer  $N_0 = d$ , hidden layers  $(N_{L-1}, \dots, N_1)$  and output layer  $(N_L)$ , respectively. The  
 514 parameters space of the dense architecture  $\mathbf{N}$  is denoted by  $\mathcal{N}_{\mathbf{N}}$ : it is the set of all coefficients of the  
 515 weight matrices  $\mathbf{W}_i \in \mathbb{R}^{N_i \times N_{i-1}}$  and bias vectors  $\mathbf{b}_i \in \mathbb{R}^{N_i}$ ,  $i = 1, \dots, L$ . It is easy to verify that  
 516  $\mathcal{N}_{\mathbf{N}}$  is isomorphic to  $\mathbb{R}^N$  where  $N = \sum_{i=1}^L N_{i-1} N_i + \sum_{i=1}^L N_i$  is the total number of parameters  
 517 of the architecture.

518 Clearly,  $\mathcal{N}_{\mathbf{I}} \subseteq \mathcal{N}_{\mathbf{N}}$  since:

$$\mathcal{N}_{\mathbf{I}} := \{\theta = ((\mathbf{W}_i, \mathbf{b}_i))_{i=1, \dots, L} : \text{supp}(\mathbf{W}_i) \subseteq I_i, \forall i = 1, \dots, L\}. \quad (5)$$

519 A special subset of  $\mathcal{N}_{\mathbf{I}}$  is the set of network parameters with zero biases,

$$\mathcal{N}_{\mathbf{I}}^0 := \{\theta = ((\mathbf{W}_i, \mathbf{0}_{N_i}))_{i=1, \dots, L} : \text{supp}(\mathbf{W}_i) \subseteq I_i, \forall i = 1, \dots, L\}. \quad (6)$$

520 Given an activation function  $\nu$ , the realization  $\mathcal{R}_{\theta}^{\nu}$  of a neural network  $\theta \in \mathcal{N}_{\mathbf{N}}$  is the function

$$\mathcal{R}_{\theta}^{\nu} : x \in \mathbb{R}^{N_0} \mapsto \mathcal{R}_{\theta}^{\nu}(x) := \mathbf{W}_L \nu(\dots \nu(\mathbf{W}_1 x + \mathbf{b}_1) \dots + \mathbf{b}_{L-1}) + \mathbf{b}_L \in \mathbb{R}^{N_L} \quad (7)$$

521 We denote  $\mathcal{R}^{\nu} : \theta \mapsto \mathcal{R}_{\theta}^{\nu}$  the functional mapping from a set of parameters  $\theta$  to its realization. The  
 522 function space associated to a sparse architecture  $\mathbf{I}$  and activation function  $\nu$  is the image of  $\mathcal{N}_{\mathbf{I}}$  under  
 523  $\mathcal{R}^{\nu}$ :

$$\mathcal{F}_{\mathbf{I}}^{\nu} := \mathcal{R}^{\nu}(\mathcal{N}_{\mathbf{I}}). \quad (8)$$

524 When  $\nu = \sigma$  the ReLU activation function, we recover the definition of realization in Equation (1).

525 We use the shorthands

$$\begin{aligned} \mathcal{R}_{\theta} &:= \mathcal{R}_{\theta}^{\sigma} \\ \mathcal{F}_{\mathbf{I}} &:= \mathcal{F}_{\mathbf{I}}^{\sigma}, \end{aligned} \quad (9)$$

526 as in the main text. This allows us to define  $\mathcal{L}_{\mathbf{I}}$  (cf. Equation (2)) as  $\mathcal{L}_{\mathbf{I}} := \mathcal{R}^{\text{Id}}(\mathcal{N}_{\mathbf{I}}^0)$  where  $\nu = \text{Id}$  is  
 527 the identity map, which is a subset of linear maps  $\mathbb{R}^{N_0} \mapsto \mathbb{R}^{N_L}$ .

## 528 B Proofs for results in Section 3

### 529 B.1 Proof of Proposition 3.1

530 *Proof.* First, we remind the problem of the training of a sparse neural network on a finite data set  
 531  $\mathcal{D} = \{(x_i, y_i)\}_{i=1}^P$ :

$$\underset{\theta \in \mathcal{N}_{\mathbf{I}}}{\text{Minimize}} \quad \mathcal{L}(\theta) := \sum_{i=1}^P \ell(\mathcal{R}_{\theta}(x_i), y_i), \quad (10)$$

532 which shares the same optimal value as the following optimization problem:

$$\underset{\mathbf{D} \in \mathcal{F}_{\mathbf{I}}(\Omega)}{\text{Minimize}} \quad \mathcal{L}(\mathbf{D}) := \sum_{i=1}^P \ell(\mathbf{D}[:, i], y_i) \quad (11)$$

533 where  $\Omega = \{x_i\}_{i=1}^P$ . This is simply a change of variables: from  $\mathcal{R}_{\theta}(x_i)$  to the  $i$ th column of  
 534  $\mathbf{D} = \mathcal{R}_{\theta}(\Omega)$ . We prove two implications as follows:

535 1. Assume the closedness of  $\mathcal{F}_I(\Omega)$  for every finite  $\Omega$ . Then an optimal solution of the optimization  
 536 problem (10) exists for every finite data set  $\{(x_i, y_i)\}_{i=1}^P$ . Consider a training set  $\{(x_i, y_i)\}_{i=1}^P$   
 537 and  $\Omega := \{x_i\}_{i=1}^P$ . Since  $\mathbf{D} := \mathbf{0}_{P \times N_L} \in \mathcal{F}_I(\Omega)$  (by setting all parameters in  $\theta$  equal to zero),  
 538 the set  $\mathcal{F}_I(\Omega)$  is non-empty. The optimal value of (11) is thus upper bounded by  $\mathcal{L}(\mathbf{0})$ . Since the  
 539 function  $\ell(\cdot, y_i)$  is coercive for every  $y_i$  in the training set, there exists a constant  $C$  (dependent  
 540 on the training set and the loss) such that minimizing (11) on  $\mathcal{F}_I(\Omega)$  or on  $\mathcal{F}_I(\Omega) \cap \mathcal{B}(\mathbf{0}, C)$   
 541 (with  $\mathcal{B}(\mathbf{0}, C)$  the  $L^2$  ball of radius  $C$  centered at zero) yields the same infimum. The function  
 542  $\mathcal{L}$  is continuous, since each  $\ell(\cdot, y_i)$  is continuous by assumption, and the set  $\mathcal{F}_I(\Omega) \cap \mathcal{B}(\mathbf{0}, C)$  is  
 543 compact, since it is closed (as an intersection of two closed sets) and bounded (since  $\mathcal{B}(\mathbf{0}, C)$  is  
 544 bounded). As a result there exists a matrix  $\mathbf{D} \in \mathcal{F}_I(\Omega) \cap \mathcal{B}(\mathbf{0}, C)$  yielding the optimal value for  
 545 (11). Thus, the parameters  $\theta$  such that  $\mathcal{R}_\theta(\Omega) = \mathbf{D}$  is an optimal solution of (10).

2. Assume that an optimal solution of problem (10) exists for every finite data set  $\{(x_i, y_i)\}_{i=1}^P$ . Then  
 $\mathcal{F}_I(\Omega)$  is closed for every  $\Omega$  finite. We prove the contraposition of this claim. Assume there exists  
 a finite set  $\Omega = \{x_i\}_{i=1}^P$  such that  $\mathcal{F}_I(\Omega)$  is not closed. Then, there exists a matrix  $\mathbf{D} \in \mathbb{R}^{N_L \times P}$   
 such that  $\mathbf{D} \in \overline{\mathcal{F}_I(\Omega)} \setminus \mathcal{F}_I(\Omega)$ . Consider the dataset  $\{(x_i, y_i)\}_{i=1}^P$  where  $y_i \in \mathbb{R}^{N_L}$  is the  $i$ th  
 column of  $\mathbf{D}$ . We prove that the infimum value of (10) is  $V := \sum_{i=1}^P \ell(y_i, y_i)$ . Indeed, since  
 $\mathbf{D} \in \overline{\mathcal{F}_I(\Omega)}$ , there exists a sequence  $\{\theta_k\}_{k \in \mathbb{N}}$  such that  $\lim_{k \rightarrow \infty} \mathcal{R}_{\theta_k}(\Omega) = \mathbf{D}$ . Therefore, by  
 continuity of  $\ell(\cdot, y_i)$ , we have:

$$\lim_{k \rightarrow \infty} \mathcal{L}(\theta_k) = \sum_{i=1}^P \lim_{k \rightarrow \infty} \ell(\mathcal{R}_{\theta_k}(x_i), y_i) = \sum_{i=1}^P \ell(y_i, y_i) = V.$$

546 Moreover, the infimum cannot be smaller than  $V$  because the  $i$ th summand is at least  $\ell(y_i, y_i)$   
 547 (due to the assumption on  $\ell$  in Proposition 3.1). Therefore, the infimum value is indeed  $V$ . Since  
 548 we assume that  $y$  is the only minimizer of  $y' \mapsto \ell(y', y)$ , this value can be achieved only if there  
 549 exists a parameter  $\theta \in \mathbf{I}$  such that  $\mathcal{R}_\theta(\Omega) = \mathbf{D}$ . This is impossible due to our choice of  $\mathbf{D}$  which  
 550 does not belong to  $\mathcal{F}_I(\Omega)$ . We conclude that with our constructed data set  $\mathcal{D}$ , an optimal solution  
 551 does not exist for (10).  $\square$

## 552 B.2 Proof of Lemma 3.2

553 The proof of Lemma 3.2 (and thus, as discussed in the main text, of Theorem 3.1) use four technical  
 554 lemmas. Lemma B.1 is proved in Appendix C.1 since it involves Theorem 4.1. The other lemmas are  
 555 proved right after the proof of Lemma 3.2.

556 **Lemma B.1.** If  $\mathbf{A} \in \overline{\mathcal{L}_I} \setminus \mathcal{L}_I \subseteq \mathbb{R}^{N_L \times N_0}$  then the function  $f : x \mapsto f(x) := \mathbf{A}x$  satisfies  $f \in$   
 557  $\overline{\mathcal{F}_I(\Omega)} \setminus \mathcal{F}_I(\Omega)$  for every subset  $\Omega$  of  $\mathbb{R}^{N_0}$  that is bounded with non-empty interior.

558 **Lemma B.2.** Consider  $\Omega = \{x_i\}_{i=1}^P$  a finite subset of  $\mathbb{R}^d$  and  $\Omega' = [-B, B]^d$  such that  $\Omega \subseteq \Omega'$ . If  
 559  $f \in \overline{\mathcal{F}_I(\Omega')}$  (under the topology induced by  $\|\cdot\|_\infty$ ), then  $\mathbf{D} := [f(x_1) \dots f(x_P)] \in \overline{\mathcal{F}_I(\Omega)}$ .

560 **Lemma B.3.** Consider  $\mathcal{R}_\theta$ , the realization of a ReLU neural network with parameter  $\theta \in \mathbf{I}$ . This  
 561 function is continuous and piecewise linear. On the interior of each piece, its Jacobian matrix is  
 562 constant and satisfies  $\mathbf{J} \in \mathcal{L}_I$ .

**Lemma B.4.** For  $p, N \in \mathbb{N}$ , consider the following set of points (a discretized grid for  $[0, 1]^N$ ):

$$\Omega = \Omega_p^N = \left\{ \left( \frac{i_1}{p}, \dots, \frac{i_N}{p} \right) \mid 0 \leq i_j \leq p, i_j \in \mathbb{N}, \forall 1 \leq j \leq N \right\}.$$

If  $H \in \mathbb{N}$  satisfies  $p \geq 3NH$ , then for any collection of  $H$  hyperplanes, there exists  $x \in \Omega_p^N$  such  
 that the elementary hypercube whose vertices are of the form

$$\left\{ x + \left( \frac{i_1}{p}, \dots, \frac{i_N}{p} \right) \mid i_j \in \{0, 1\} \forall 1 \leq j \leq N \right\} \subseteq \Omega_p^N$$

563 lies entirely inside a polytope delimited by these hyperplanes.

564 We are now ready to prove Lemma 3.2

*Proof of Lemma 3.2* Since  $\mathcal{L}_I$  is not closed, there exists a matrix  $\mathbf{A} \in \overline{\mathcal{L}_I} \setminus \mathcal{L}_I$ , and we consider  $f(x) := \mathbf{A}x$ . Setting  $p := 3N_0 4^{\sum_{i=1}^{L-1} N_i}$  we construct  $\Omega$  as the grid:

$$\Omega = \left\{ \left( \frac{i_1}{p}, \dots, \frac{i_{N_0}}{p} \right) \mid 0 \leq i_j \leq p, i_j \in \mathbb{N}, \forall 1 \leq j \leq N_0 \right\},$$

so that the cardinality of  $\Omega = \{x_i\}_{i=1}^P$  is  $P := (p+1)^{N_0}$ . Similar to the sketch proof, consider  $\mathbf{D} := [f(x_1), f(x_2), \dots, f(x_P)]$ . Our goal is to prove that  $\mathbf{D} \in \overline{\mathcal{F}_I(\Omega)} \setminus \mathcal{F}_I(\Omega)$ .

First, notice that  $\mathbf{D} \in \overline{\mathcal{F}_I(\Omega)}$  as an immediate consequence of Lemma B.2 and Lemma B.1.

It remains to show that  $\mathbf{D} \notin \mathcal{F}_I(\Omega)$ . We proceed by contradiction, assuming that there exists  $\theta \in \mathcal{N}_I$  such that  $\mathcal{R}_\theta(\Omega) = \mathbf{D}$ .

To show the contradiction, we start by showing that, as a consequence of Lemma B.4 there exists  $x \in \Omega$  such that the hypercube whose vertices are the  $2^{N_0}$  points

$$\left\{ x + \left( \frac{i_1}{p}, \dots, \frac{i_{N_0}}{p} \right) \mid i_j \in \{0, 1\}, \forall 1 \leq j \leq N_0 \right\} \subseteq \Omega, \quad (12)$$

lies entirely inside a linear region  $\mathcal{P}$  of the continuous piecewise linear function  $\mathcal{R}_\theta$  [1]. Denote  $K = 2^{\sum_{i=1}^L N_i}$  a bound on the number of such linear regions, see e.g. [24]. Each frontier between a pair of linear regions can be completed into a hyperplane, leading to at most  $H = K^2$  hyperplanes. Since  $p = 3N_0 K^2 \geq 3N_0 H$ , by Lemma B.4 there exists  $x \in \Omega$  such that the claimed hypercube lies entirely inside a polytope delimited by these hyperplanes. As this polytope is itself included in some linear region  $\mathcal{P}$  of  $\mathcal{R}_\theta$ , this establishes our intermediate claim.

Now, define  $v_0 := x$  and  $v_i := x + (1/p)\mathbf{e}_i, i \in \llbracket N_0 \rrbracket$  where  $\mathbf{e}_i$  is the  $i$ th canonical vector. Denote  $\mathbf{P} \in \mathbb{R}^{N_L \times N_0}$  the matrix such that the restriction of  $\mathcal{R}_\theta$  to the piece  $\mathcal{P}$  is  $f_{\mathcal{P}}(x) = \mathbf{P}x + \mathbf{b}$ . Since  $\mathbf{P}$  is the Jacobian matrix of  $\mathcal{R}_\theta$  in the linear region  $\mathcal{P}$ , we deduce from Lemma B.3 that  $\mathbf{P} \in \mathcal{L}_I$ . Since the points  $v_i$  belong to the hypercube which is both included in  $\mathcal{P}$  and in  $\Omega$  we have for each  $i$ :

$$\begin{aligned} \mathbf{P}(v_0 - v_i) &= f_{\mathcal{P}}(v_0) - f_{\mathcal{P}}(v_i) \\ &= \mathcal{R}_\theta(v_0) - \mathcal{R}_\theta(v_i) \\ &= f(v_0) - f(v_i) \\ &= \mathbf{A}(v_0 - v_i). \end{aligned}$$

where the third equality follows from the definition of  $\mathbf{D}$  and the fact that we assume  $\mathcal{R}_\theta(\Omega) = \mathbf{D}$ . Since  $v_0 - v_i = \mathbf{e}_i/p, i = 1, \dots, n$  are linearly independent, we conclude that  $\mathbf{P} = \mathbf{A}$ . This implies  $\mathbf{A} \in \mathcal{L}_I$ , hence the contradiction. This concludes the proof.  $\square$

We now prove the intermediate technical lemmas.

*Proof of Lemma B.2* Since  $f \in \overline{\mathcal{F}_I(\Omega')}$ , there exists a sequence  $\{\theta_k\}_{k \in \mathbb{N}}$  such that:

$$\lim_{k \rightarrow \infty} \sup_{x \in \Omega'} \|f(x) - \mathcal{R}_{\theta_k}(x)\| = 0$$

Denoting  $\mathbf{D}_k := [\mathcal{R}_{\theta_k}(x_1) \dots \mathcal{R}_{\theta_k}(x_P)]$ , since  $x_i \in \Omega \subseteq \Omega', i = 1, \dots, P$ , it follows that  $\mathbf{D}_k$  converges to  $\mathbf{D}$ . Since  $\mathbf{D}_k \in \mathcal{F}_I(\Omega)$  by construction, we get that  $\mathbf{D} \in \overline{\mathcal{F}_I(\Omega)}$ .  $\square$

*Proof of Lemma B.3* For any  $\theta \in \mathcal{I}$ ,  $\mathcal{R}_\theta$  is a continuous piecewise linear function since it is the realization of a ReLU neural network [1]. Consider  $\mathcal{P}$  a linear region of  $\mathcal{R}_\theta$  with non-empty interior. The Jacobian matrix of  $\mathcal{P}$  has the following form [28, Lemma 9]:

$$\mathbf{J} = \mathbf{W}_L \mathbf{D}_{L-1} \mathbf{W}_{L-1} \mathbf{D}_{L-2} \dots \mathbf{D}_1 \mathbf{W}_1$$

where  $\mathbf{D}_i$  is a binary diagonal matrix (diagonal matrix whose coefficients are either one or zero). Since  $\text{supp}(\mathbf{D}_i \mathbf{W}_i) \subseteq \text{supp}(\mathbf{W}_i) \subseteq I_i$ , we have:  $\mathbf{J} = \mathbf{W}_L \prod_{i=1}^{L-1} (\mathbf{D}_i \mathbf{W}_i) \in \mathcal{L}_I$ .  $\square$

*Proof of Lemma B.4* Every edge of an elementary hypercube can be written as:

$$\left(x, x + \frac{1}{p}\mathbf{e}_i\right), x \in \Omega_p^N$$

where  $\mathbf{e}_i$  is the  $i$ th canonical vector,  $1 \leq i \leq N$ . The points  $x$  and  $x + (1/p)\mathbf{e}_i$  are two *endpoints*. Note that in this proof we use the notation  $(a, b)$  to denote the line segment whose endpoints are  $a$  and  $b$ . By construction,  $\Omega_p^N$  contains  $p^N$  such elementary hypercubes. Given a collection of  $H$  hyperplanes, we say that an elementary hypercube is an *intersecting hypercube* if it does not lie entirely inside a polytope generated by the hyperplanes, meaning that there exists a hyperplane that *intersects* at least one of its edges. More specifically, an edge and a hyperplane intersect if they have *exactly* one common point. We exclude the case where there are more than two common points since that implies that the edge lies completely in the hyperplane. The edges that are intersected by at least one hyperplane are called *intersecting edges*. Note that a hypercube can have intersecting edges, but it may not be an intersecting one. A visual illustration of this idea is presented in Figure 3.

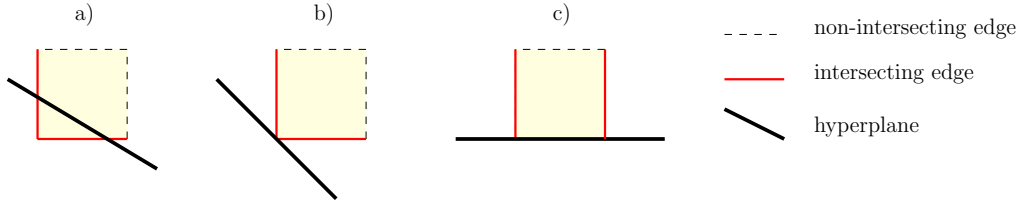

Figure 3: Illustration of definitions in  $\mathbb{R}^2$ : a) an intersecting hypercube with two intersecting edges; b) *not* an intersecting hypercube, but it has two intersecting edges; c) *not* an intersecting hypercube and it only has two intersecting edges (not three according to our definitions: the bottom edge is *not* intersecting).

Formally, a hyperplane  $\{w^\top x + b = 0\}$  for  $w \in \mathbb{R}^N$  and  $b \in \mathbb{R}$  intersects an edge  $(x, x + \frac{1}{p}\mathbf{e}_i)$  if:

$$\begin{cases} (w^\top x + b) \left[ w^\top (x + \frac{1}{p}\mathbf{e}_i) + b \right] \leq 0 \\ \text{and} \\ w^\top x + b \neq 0 \text{ or } w^\top (x + \frac{1}{p}\mathbf{e}_i) + b \neq 0 \end{cases} \quad (13)$$

We further illustrate these notions in Figure 4. We emphasize that according to Equation (13),  $\ell_3$  in Figure 4 does not intersect any edge *along its direction*.

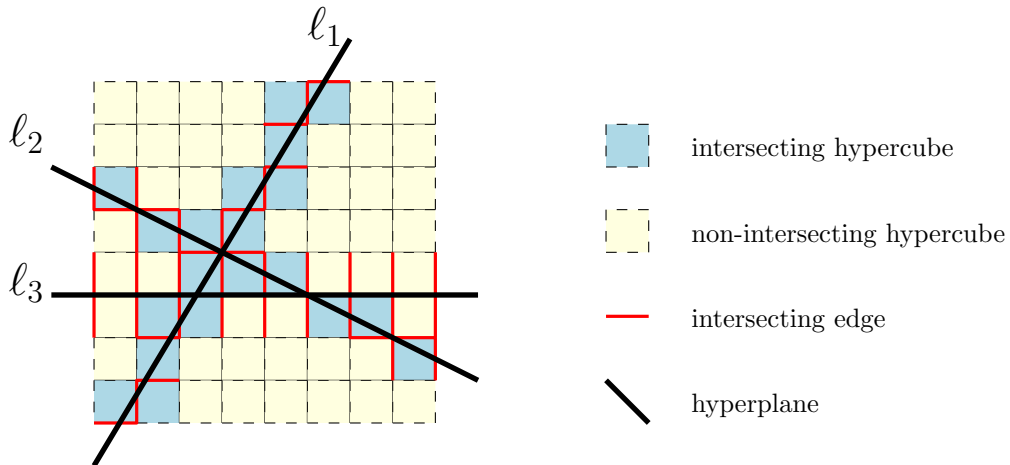

Figure 4: Illustration of intersecting hypercubes and hyperplanes in  $\mathbb{R}^2$ .

Clearly, the number of intersecting hypercubes is upper bounded by the number of intersecting edges. The rest of the proof is devoted to showing that this number is strictly smaller than  $p^N$  if  $p \geq 3NH$ , as this will imply the existence of at least one non-intersecting hypercube.

To estimate the *maximum* number of intersecting edges, we analyze the *maximum* number of edges that a given hyperplane can intersect. For a fixed index  $1 \leq i \leq N$ , we count the number of edges of the form  $(x, x + \frac{1}{p}\mathbf{e}_i)$  intersected by a single hyperplane. The key observation is: if we fix all the coordinates of  $x$  except the  $i$ th one, then the edges  $(x, x + \frac{1}{p}\mathbf{e}_i)$  form a line in the ambient space. Among those edges, there are at most *two* intersecting edges with respect to the given hyperplane. This happens only when the hyperplane intersects an edge at one of its endpoints (e.g., the hyperplane  $\ell_2$  and the second vertical line in Figure 4). In total, for each  $1 \leq i \leq N$  and each given hyperplane, there are at most  $2(p+1)^{N-1}$  intersecting edges of the form  $(x, x + \frac{1}{p}\mathbf{e}_i)$ . For a given hyperplane, there are thus at most  $2N(p+1)^{N-1}$  intersecting edges in total (since  $i \in \llbracket N \rrbracket$ ). Since the number of hyperplanes is at most  $H$ , there are at most  $2NH(p+1)^{N-1}$  intersecting edges, and this quantity also bounds the number of intersecting cubes as we have seen. With the assumption  $p \geq 3NH$ , we conclude by proving that  $p^N > 2NH(p+1)^{N-1}$ . Indeed, we have:

$$\begin{aligned} \frac{2NH(p+1)^{N-1}}{p^N} &= \frac{2NH}{p} \left( \frac{p+1}{p} \right)^{N-1} = \frac{2NH}{p} \left( 1 + \frac{1}{p} \right)^{N-1} < \frac{2NH}{p} \left( 1 + \frac{1}{p} \right)^{NH} \\ &\leq \frac{2NH}{3NH} \left( 1 + \frac{1}{3NH} \right)^{NH} \leq \frac{2e^{1/3}}{3} \approx 0.93 < 1 \end{aligned}$$

602 where we used that  $(1 + 1/n)^n \leq e \approx 2.71828$ , the Euler number.  $\square$

### 603 B.3 Proof of Theorem 3.4

604 *Proof.* We denote  $\mathbf{X} = [x_1, \dots, x_P] \in \mathbb{R}^{N_0 \times P}$ , the matrix representation of  $\Omega$ . Our proof has three  
605 main steps:

606 **Step 1:** We show that we can reduce the study of the closedness of  $\mathcal{F}_I(\Omega)$  to that of the closedness  
607 of a union of subsets of  $\mathbb{R}^P$ , associated to the vectors  $\mathbf{W}_2$ . To do this, we prove that for any element  
608  $f \in \mathcal{F}_I(\Omega)$ , there exists a set of parameters  $\theta \in \mathcal{N}_I$  such that the matrix of the second layer  $\mathbf{W}_2$   
609 belongs to  $\{-1, 0, 1\}^{1 \times N_1}$  (since we assume  $N_2 = 1$ ). This idea is reused from the proof of [1]  
610 Theorem 4.1].

For  $\theta := \{(\mathbf{W}_i, \mathbf{b}_i)_{i=1}^2\} \in \mathcal{N}_I$ , the function  $\mathcal{R}(\theta)$  has the form:

$$\mathcal{R}_\theta(x) = \mathbf{W}_2 \sigma(\mathbf{W}_1 x + \mathbf{b}_1) + \mathbf{b}_2 = \sum_{i=1}^{N_1} \mathbf{w}_{2,i} \sigma(\mathbf{w}_{1,i} x + \mathbf{b}_{1,i}) + \mathbf{b}_2$$

where  $\mathbf{w}_{1,i} = \mathbf{W}_1[i, :] \in \mathbb{R}^{1 \times N_0}$ ,  $\mathbf{w}_{2,i} = \mathbf{W}_2[i] \in \mathbb{R}$ ,  $\mathbf{b}_{1,i} = \mathbf{b}[i] \in \mathbb{R}$ . Moreover, if  $w_{2,i}$  is different from zero, we have:

$$\mathbf{w}_{2,i} \sigma(\mathbf{w}_{1,i} x + \mathbf{b}_1) = \frac{\mathbf{w}_{2,i}}{|\mathbf{w}_{2,i}|} \sigma(|\mathbf{w}_{2,i}| \mathbf{w}_{1,i} x + |\mathbf{w}_{2,i}| \mathbf{b}_{1,i}).$$

611 In that case, one can assume that  $\mathbf{w}_{2,i}$  can be equal to either  $-1$  or  $1$ . Thus, we can assume  
612  $\mathbf{w}_{2,i} \in \{\pm 1, 0\}$ . For a vector  $\mathbf{v} \in \{-1, 0, 1\}^{1 \times N_1}$ , we define:

$$F_{\mathbf{v}} = \{[\mathcal{R}_\theta(x_1), \dots, \mathcal{R}_\theta(x_P)] \mid \theta \in \mathcal{N}_{I,\mathbf{v}}\} \quad (14)$$

613 where  $\mathcal{N}_{I,\mathbf{v}} \subseteq \mathcal{N}_I$  is the set of  $\theta = \{(\mathbf{W}_i, \mathbf{b}_i)_{i=1}^2\}$  with  $\mathbf{W}_2 = \mathbf{v} \in \{0, 1\}^{1 \times N_1}$ , i.e., in words,  $F_{\mathbf{v}}$  is  
614 the image of  $\Omega$  through the function  $\mathcal{R}_\theta$ ,  $\theta \in \mathcal{N}_{I,\mathbf{v}}$ .

Define  $\mathbb{V} := \{\mathbf{v} \mid \text{supp}(\mathbf{v}) \subseteq I_2\} \cap \{0, \pm 1\}^{1 \times N_1}$ . Clearly, for  $\mathbf{v} \in \mathbb{V}$ ,  $F_{\mathbf{v}} \subseteq \mathcal{F}_I(\Omega)$ . Therefore,

$$\bigcup_{\mathbf{v} \in \mathbb{V}} F_{\mathbf{v}} \subseteq \mathcal{F}_I(\Omega).$$

Moreover, by our previous argument, we also have:

$$\mathcal{F}_I(\Omega) \subseteq \bigcup_{\mathbf{v} \in \mathbb{V}} F_{\mathbf{v}}.$$

Therefore,

$$\mathcal{F}_I(\Omega) = \bigcup_{\mathbf{v} \in \mathbb{V}} F_{\mathbf{v}}.$$

615 **Step 2:** Using the first step, to prove that  $\mathcal{F}_1(\Omega)$  is closed, it is sufficient to prove that  $F_{\mathbf{v}}$  is closed,  
 616  $\forall \mathbf{v} \in \mathbb{V}$ . This can be accomplished by further decomposing  $F_{\mathbf{v}}$  into smaller closed sets. We denote  
 617  $\theta'$  the set of parameters  $\mathbf{W}_1, \mathbf{b}_1$  and  $\mathbf{b}_2$ . In the following, only the parameters of  $\theta'$  are varied since  
 618  $\mathbf{W}_2$  is now fixed to  $\mathbf{v}$ .

619 Due to the activation function  $\sigma$ , for a given data point  $x_j \in \Omega$ , we have:

$$\sigma(\mathbf{W}x_j + \mathbf{b}_1) = \mathbf{D}_j(\mathbf{W}x_j + \mathbf{b}_1) \quad (15)$$

620 where  $\mathbf{D}_j \in \mathcal{D}$ , the set of binary diagonal matrices, and its diagonal coefficients  $\mathbf{D}_j[i, i]$  are  
 621 determined by:

$$\mathbf{D}_j[i, i] = \begin{cases} 0 & \text{if } \mathbf{W}[i, :]x_j + \mathbf{b}_1[i] \leq 0 \\ 1 & \text{if } \mathbf{W}[i, :]x_j + \mathbf{b}_1[i] \geq 0 \end{cases}. \quad (16)$$

Note that  $\mathbf{D}_j[i, i]$  can take both values 0 or 1 if  $\mathbf{W}[i, :]x_j + \mathbf{b}_1[i] = 0$ . We call the matrix  $\mathbf{D}_j$  the activation matrix of  $x_j$ . Therefore, for (15) to hold, the  $N_1$  constraints of the form (16) must hold simultaneously. It is important to notice that all these constraints are linear w.r.t.  $\theta'$ . We denote  $\mathbf{z}$  a vectorized version of  $\theta'$  (i.e., we concatenate all coefficients whose indices are in  $I_1$  of  $\mathbf{W}$  and  $\mathbf{b}_1, \mathbf{b}_2$  into a long vector), and we write all the constraints in (15) in a compact form:

$$\mathcal{A}(\mathbf{D}_j, x_j)\mathbf{z} \leq \mathbf{0}_{N_1}$$

622 where  $\mathcal{A}(\mathbf{D}_j, x_j)$  is a constant matrix that depend on  $\mathbf{D}_j$  and  $x_j$ .

Set  $\theta = (\mathbf{v}, \mathbf{z})$ . Given that (15) holds, we deduce that:

$$\mathcal{R}_{\theta}(x_j) = \mathbf{v}\sigma(\mathbf{W}x_j + \mathbf{b}_1) + \mathbf{b}_2 = \mathbf{v}\mathbf{D}_j(\mathbf{W}x_j + \mathbf{b}_1) + \mathbf{b}_2 = \mathcal{V}(\mathbf{D}_j, x_j, \mathbf{v})\mathbf{z}$$

where  $\mathcal{V}(\mathbf{D}_j, x_j, \mathbf{v})$  is a constant matrix that depends on  $\mathbf{D}_j, \mathbf{v}, x_j$ . In particular,  $\mathcal{R}_{\theta}(x_j)$  is also a linear function w.r.t the parameters  $\mathbf{z}$ . Assume that the activation matrices of  $(x_1, \dots, x_P)$  are  $(\mathbf{D}_1, \dots, \mathbf{D}_P)$ , then we have:

$$\mathcal{R}_{\theta}(\Omega) = (\mathcal{V}(\mathbf{D}_1, x_1, \mathbf{v})\mathbf{z}, \dots, \mathcal{V}(\mathbf{D}_P, x_P, \mathbf{v})\mathbf{z}) \in \mathbb{R}^{1 \times P}.$$

To emphasize that  $\mathcal{R}_{\theta}(\Omega)$  depends linearly on  $\mathbf{z}$ , for the rest of the proof, we will write  $\mathcal{R}_{\theta}(\Omega)$  as a vector of size  $P$  (instead of a row matrix  $1 \times P$ ) as follows:

$$\mathcal{R}_{\theta}(\Omega) = \mathcal{V}(\mathbf{D}_1, \dots, \mathbf{D}_P)\mathbf{z} \quad \text{where} \quad \mathcal{V}(\mathbf{D}_1, \dots, \mathbf{D}_P) = \begin{pmatrix} \mathcal{V}(\mathbf{D}_1, x_1, \mathbf{v}) \\ \vdots \\ \mathcal{V}(\mathbf{D}_P, x_P, \mathbf{v}) \end{pmatrix}.$$

Moreover, to have  $(\mathbf{D}_1, \dots, \mathbf{D}_P)$  activation matrices, the parameters  $\mathbf{z}$  need to satisfy:

$$\mathcal{A}(\mathbf{D}_1, \dots, \mathbf{D}_P)\mathbf{z} \leq \mathbf{0}_Q$$

where  $Q = PN_1$  and

$$\mathcal{A}(\mathbf{D}_1, \dots, \mathbf{D}_P) = \begin{pmatrix} \mathcal{A}(\mathbf{D}_1, x_1) \\ \vdots \\ \mathcal{A}(\mathbf{D}_P, x_P) \end{pmatrix}.$$

Thus, the set of  $\mathcal{R}_{\theta}(\Omega)$  given the activation matrices  $(\mathbf{D}_1, \dots, \mathbf{D}_P)$  has the following compact form:

$$F_{\mathbf{v}}^{(\mathbf{D}_1, \dots, \mathbf{D}_P)} := \{\mathcal{V}(\mathbf{D}_1, \dots, \mathbf{D}_P)\mathbf{z} \mid \mathcal{A}(\mathbf{D}_1, \dots, \mathbf{D}_P)\mathbf{z} \leq \mathbf{0}\}.$$

Clearly,  $F_{\mathbf{v}}^{(\mathbf{D}_1, \dots, \mathbf{D}_P)} \subseteq F_{\mathbf{v}}$  since each element is equal to  $\mathcal{R}_{\theta}(\Omega)$  with  $\theta = (\mathbf{v}, \mathbf{z})$  for some  $\mathbf{z}$ . On the other hand, each element of  $F_{\mathbf{v}}$  is an element of  $F_{\mathbf{v}}^{(\mathbf{D}_1, \dots, \mathbf{D}_P)}$  for some  $(\mathbf{D}_1, \dots, \mathbf{D}_P) \in \mathcal{D}^P$  since the set of activation matrices corresponding to any  $\theta$  is in  $\mathcal{D}^P$ . Therefore,

$$F_{\mathbf{v}} = \bigcup_{(\mathbf{D}_1, \dots, \mathbf{D}_P) \in \mathcal{D}^P} F_{\mathbf{v}}^{(\mathbf{D}_1, \dots, \mathbf{D}_P)}.$$

623 **Step 3:** Using the previous step, it is sufficient to prove that  $F_{\mathbf{v}}^{(\mathbf{D}_1, \dots, \mathbf{D}_P)}$  is closed, for any  
 624  $\mathbf{v}, (\mathbf{D}_1, \dots, \mathbf{D}_P) \in \mathcal{D}^P$ . To do so, we write  $F_{\mathbf{v}}^{(\mathbf{D}_1, \dots, \mathbf{D}_P)}$  in a more general form:

$$\{\mathbf{A}\mathbf{z} \mid \mathbf{C}\mathbf{z} \leq \mathbf{y}\}. \quad (17)$$

625 Therefore, it is sufficient to prove that a set as in Equation (17) is closed. These sets are linear  
 626 transformations of an intersection of a finite number of half-spaces. Since the intersection of a  
 627 finite number of halfspaces is *stable* under linear transformations (cf. Lemma B.5 below), and the  
 628 intersection of a finite number of half-spaces is a closed set itself, the proof can be concluded.  $\square$

**Lemma B.5** (Closure of intersection of half-spaces under linear transformations). *For any  $\mathbf{A} \in \mathbb{R}^{m \times n}$ ,  $\mathbf{C} \in \mathbb{R}^{\ell \times n}$ ,  $\mathbf{y} \in \mathbb{R}^{\ell}$ , there exists  $\mathbf{C}' \in \mathbb{R}^{k \times m}$ ,  $\mathbf{b}' \in \mathbb{R}^k$  such that:*

$$\{\mathbf{A}\mathbf{x} \mid \mathbf{C}\mathbf{x} \leq \mathbf{y}\} = \{\mathbf{C}'\mathbf{z} \leq \mathbf{b}'\}.$$

*Proof.* The proof uses Fourier–Motzkin elimination<sup>4</sup>. This method is a quantifier elimination algorithm for linear functions<sup>5</sup>. In fact, the LHS can be written as:  $\{\mathbf{t} \mid \mathbf{t} = \mathbf{A}\mathbf{x}, \mathbf{C}\mathbf{x} \leq \mathbf{y}\}$ , or more generally,

$$\left\{ \mathbf{t} \mid \exists \mathbf{x} \in \mathbb{R}^n \text{ s.t. } \mathbf{B} \begin{pmatrix} \mathbf{x} \\ \mathbf{t} \end{pmatrix} \leq \mathbf{v} \right\} \subseteq \mathbb{R}^m$$

629 where  $\begin{pmatrix} \mathbf{x} \\ \mathbf{t} \end{pmatrix}$  is the concatenation of two vectors  $(\mathbf{x}, \mathbf{t})$  and the linear constraints imposed by  $\mathbf{B} \begin{pmatrix} \mathbf{x} \\ \mathbf{t} \end{pmatrix} \leq \mathbf{v}$   
 630 replace the two linear constraints  $\mathbf{C}\mathbf{x} \leq \mathbf{y}$  and  $\mathbf{t} = \mathbf{A}\mathbf{x}$ . The idea is to show that:

$$\left\{ \mathbf{t} \mid \exists \mathbf{x} \in \mathbb{R}^n \text{ s.t. } \mathbf{B} \begin{pmatrix} \mathbf{x} \\ \mathbf{t} \end{pmatrix} \leq \mathbf{v} \right\} = \left\{ \mathbf{t} \mid \exists \mathbf{x}' \in \mathbb{R}^{n-1} \text{ s.t. } \mathbf{B}' \begin{pmatrix} \mathbf{x}' \\ \mathbf{t} \end{pmatrix} \leq \mathbf{v}' \right\} \quad (18)$$

631 for some matrix  $\mathbf{B}'$  and vector  $\mathbf{v}'$ . By doing so, we reduce the dimension of the quantified parameter  
 632  $\mathbf{x}$  by one. By repeating this procedure until there is no more quantifier, we prove the lemma. The  
 633 rest of this proof is thus devoted to show that  $\mathbf{B}'$ ,  $\mathbf{v}'$  as in (18) do exist.

634 We will show how to eliminate the first coordinate of  $\mathbf{x}[1]$ . First, we partition the set of linear  
 635 constraints of LHS of (18) into three groups:

636 1.  $S_0 := \{j \mid \mathbf{B}[j, 1] = 0\}$ : In this case,  $\mathbf{x}[1]$  does not appear in this constraint, there is nothing  
 637 to do.

2.  $S_+ := \{j \mid \mathbf{B}[j, 1] > 0\}$ , for  $j \in S_+$ , we can rewrite the constraints  $\mathbf{B}[j, :]\begin{pmatrix} \mathbf{x} \\ \mathbf{t} \end{pmatrix} \leq \mathbf{v}[j]$  as:

$$\mathbf{x}[1] \leq \gamma[j] + \sum_{i=2}^n \alpha[i] \mathbf{x}[i] + \sum_{i=1}^m \beta[i] \mathbf{t}[i] := B_j^+(\mathbf{x}', \mathbf{t})$$

638 for some suitable  $\gamma[j], \alpha[i], \beta[i]$  where  $\mathbf{x}'$  is the last  $(n-1)$  coordinate of the vector  $\mathbf{x}$ .

3.  $S_- := \{j \mid \mathbf{B}[j, 1] < 0\}$ : for  $j \in S_-$ , we can rewrite the constraints  $\mathbf{B}[j, :]\begin{pmatrix} \mathbf{x} \\ \mathbf{t} \end{pmatrix} \leq \mathbf{v}[j]$  as:

$$\mathbf{x}[1] \geq \gamma[j] + \sum_{i=2}^n \alpha[i] \mathbf{x}[i] + \sum_{i=1}^m \beta[i] \mathbf{t}[i] := B_j^-(\mathbf{x}', \mathbf{t}).$$

639 For the existence of such  $\mathbf{x}[1]$ , it is necessary and sufficient that:

$$B_k^+(\mathbf{x}', \mathbf{t}) \geq B_j^-(\mathbf{x}', \mathbf{t}), \quad \forall k \in S_+, j \in S_-. \quad (19)$$

Thus, we form the matrix  $\mathbf{B}'$  and the vector  $\mathbf{v}'$  such that the linear constraints written in the following form:

$$\mathbf{B}' \begin{pmatrix} \mathbf{x}' \\ \mathbf{t} \end{pmatrix} \leq \mathbf{v}'$$

640 represent all the linear constraints in the set  $S_0$  and those in the form of (19). Using this procedure  
 641 recursively, one can eliminate all quantifiers and prove the lemma.  $\square$

<sup>4</sup>More detail about this method can be found in this [link](#)

<sup>5</sup>In fact, the algorithm determining the closedness of  $\mathcal{L}_1$  is also a quantifier elimination one, but it can be used in a more general setting: polynomials



#### 642 B.4 Proofs for Lemma 3.3

643 Since we use tools of real algebraic geometry, this section provides basic notions of real algebraic  
 644 geometry for readers who are not familiar with this domain. It is organized and presented as in the  
 645 textbook [2] (with slight modifications to better suit our needs). For a more complete presentation,  
 646 we refer readers to [2] Chapter 2].

**Definition B.1** (Semi-algebraic sets). *A semi-algebraic set of  $\mathbb{R}^n$  has the form:*

$$\bigcup_{i=1}^k \{x \in \mathbb{R}^n \mid P_i(x) = 0 \wedge \bigwedge_{j=1}^{\ell_i} Q_{i,j}(x) > 0\}$$

647 where  $P_i, Q_{i,j} : \mathbb{R}^n \mapsto \mathbb{R}$  are polynomials and  $\wedge$  is the “and” logic.

648 The following theorem is known as the projection theorem of semi-algebraic sets. In words, the  
 649 theorem states that: The projection of a semi-algebraic set to a lower dimension is still a semi-algebraic  
 650 set (of lower dimension).

**Theorem B.6** (Projection theorem of semi-algebraic sets [2] Theorem 2.92)]. *Let  $A$  be a semi-algebraic set of  $\mathbb{R}^n$  and define:*

$$B = \{(x_1, \dots, x_{n-1}) \mid \exists x_n, (x_1, \dots, x_{n-1}, x_n) \in A\}$$

651 then  $B$  is a semi-algebraic set of  $\mathbb{R}^{n-1}$ .

652 Theorem B.6 is a powerful result. Its proof [2] Section 2.4] (which is constructive) shows a way to  
 653 express  $B$  (in Theorem B.6) by using only the first  $n - 1$  variables  $(x_1, \dots, x_{n-1})$ .

654 Next, we introduce the language of an ordered field and sentence. Readers which are not familiar  
 655 to the notion of ordered field can simply think of it as  $\mathbb{R}$  and its subring as  $\mathbb{Q}$ . Example for fields  
 656 that is not ordered is  $\mathbb{C}$  (we cannot compare two arbitrary complex number). Therefore, the notion  
 657 of semi-algebraic set in Definition B.1 (which contains  $Q_{i,j}(x) > 0$ ) does not make sense when the  
 658 underlying field is not ordered.

659 The central definition of the language of  $\mathbb{R}$  is *formula*, an abstraction of semi-algebraic sets. In  
 660 particular, the definition of formula is recursive: formula is built from atoms - equalities and  
 661 inequalities of polynomials whose coefficients are in a subring  $\mathbb{Q}$  of  $\mathbb{R}$ . It can be also formed by  
 662 combining with logical connectives “and”, “or”, and “negation” ( $\wedge, \vee, \neg$ ) and existential/universal  
 663 quantifiers ( $\exists, \forall$ ). Formula has variables, which are those of atoms in the formula itself. *Free variables*  
 664 of a formula are those which are not preceded by a quantifier ( $\exists, \forall$ ). The definitions of a formula and  
 665 its free variables are given recursively as follow:

666 **Definition B.2** (Language of the ordered field with coefficients in a ring). *Consider  $\mathbf{R}$  an ordered*  
 667 *field and  $\mathbf{Q} \subseteq \mathbf{R}$  a subring, a formula  $\Phi$  and its set of free variables  $\text{Free}(X)$  are defined recursively*  
 668 *as:*

669 1. *An atom: if  $P \in \mathbf{Q}[X]$  (where  $\mathbf{Q}[X]$  is the set of polynomials with coefficients in  $\mathbf{Q}$ )*  
 670 *then  $\Phi := (P = 0)$  (resp.  $\Phi := (P > 0)$ ) is a formula and its set of free variables is*  
 671  *$\text{Free}(\Phi) := \{X_1, \dots, X_n\}$  where  $n$  is the number of variables.*

672 2. *If  $\Phi_1$  and  $\Phi_2$  are formulas, then so are  $\Phi_1 \vee \Phi_2, \Phi_1 \wedge \Phi_2$  and  $\neg \Phi_1$ . The set of free variables*  
 673 *is defined as:*

- 674 (a)  $\text{Free}(\Phi_1 \vee \Phi_2) := \text{Free}(\Phi_1) \cup \text{Free}(\Phi_2)$ .
- 675 (b)  $\text{Free}(\Phi_1 \wedge \Phi_2) := \text{Free}(\Phi_1) \cup \text{Free}(\Phi_2)$ .
- 676 (c)  $\text{Free}(\neg \Phi_1) = \text{Free}(\Phi_1)$ .

677 3. *If  $\Phi$  is a formula and  $X \in \text{Free}(\Phi)$ , then  $\Phi' = (\exists X)\Phi$  and  $\Phi'' = (\forall X)\Phi$  are also formulas*  
 678 *and  $\text{Free}(\Phi') := \text{Free}(\Phi) \setminus \{X\}$ , and  $\text{Free}(\Phi'') := \text{Free}(\Phi) \setminus \{X\}$ .*

679 **Definition B.3** (Sentence). *A sentence is a formula of an ordered field with no free variable.*

**Example B.1.** *Consider two formulas:*

$$\begin{aligned}\Phi_1 &= \{\exists X_1, X_1^2 + X_2^2 = 0\} \\ \Phi_2 &= \{\exists X_1, \exists X_2, X_1^2 + X_2^2 = 0\}\end{aligned}$$



While  $\Phi_1$  is a normal formula,  $\Phi_2$  is a sentence and given an underlying field ( $\mathbb{R}$ , for instance),  $\Phi_2$  is either correct or not. Here,  $\Phi_2$  is correct (since  $X_1^2 + X_2^2 = 0$  has a root  $(0, 0)$ ). Nevertheless, if one consider  $\Phi'_2 = \{\exists X_1, \exists X_2, X_1^2 + X_2^2 = -1\}$ , then  $\Phi'_2$  is not correct.

An algorithm deciding whether a sentence is correct or not is very tempting since formula and sentence can be used to express many theorems in the language of an ordered field. The proof or disproof will be then given by an algorithm. Such an algorithm does exist, as follow:

**Theorem B.7** (Decision problem [2] Algorithm 11.36)]. *There exists an algorithm to decide whether a given sentence is correct is not with complexity  $O(sd)^{O(1)^{k-1}}$  where  $s$  is the bound on the number of polynomials in  $\Phi$ ,  $d$  is the bound on the degrees of the polynomials in  $\Phi$  and  $k$  is the number of variables.*

A full description of [2] Algorithm 11.36] (quantifier elimination algorithm) is totally out of the scope of this paper. Nevertheless, we will try to explain it in a concise way. The key observation is Theorem B.6, the central result of real algebraic geometry. As discussed right after Theorem B.6, its proof implies that one can replace a sentence by another whose number of quantifiers is reduced by one such that both sentences agree (both are true or false). Applying this procedure iteratively will result into a sentence without any variable (and the remain are only *coefficients in the subring*). We check the correctness of this final sentence by trivially verifying all the equalities/inequalities and obtain the answer for the original one.

*Proof of Lemma 3.3.* To decide whether  $\mathcal{L}_I$  is closed or not, it is equivalent to decide if the following sentence (see Definition B.3) is true or false:

$$\exists \mathbf{A}, (\forall \mathbf{X}_L, \dots, \mathbf{X}_1, P(\mathbf{A}, \mathbf{X}_L, \dots, \mathbf{X}_1) > 0) \wedge (\forall \epsilon > 0, \exists \mathbf{X}'_L, \dots, \mathbf{X}'_1, P(\mathbf{A}, \mathbf{X}'_L, \dots, \mathbf{X}'_1) - \epsilon < 0)$$

where  $P(\mathbf{A}, \mathbf{X}_1, \dots, \mathbf{X}_L) := \sum_{(i,j)} (\mathbf{A}[i, j] - P^I_{i,j}(\mathbf{X}_L, \dots, \mathbf{X}_1))^2$ .

This sentence basically asks whether there exists a matrix  $\mathbf{A} \in \overline{\mathcal{F}}_I \setminus \mathcal{F}_I$  or not. It can be proved that this sentence can be decided to be true or false using real algebraic geometry tools (see Theorem B.7), with a complexity  $O((sd)^{C^{k-1}})$  where  $C$  is a universal constant and  $s, d, k$  are the number of polynomials, the maximum degree of the polynomials and the number of variables in the sentence, respectively. Applying this to our case, we have  $s = 2, d = 2L, k = N_L N_0 + 1 + 2 \sum_{\ell=1}^L |I_\ell|$  (remind that  $|I_\ell|$  is the total number of unmasked coefficients of  $\mathbf{X}_\ell$ ).  $\square$

## B.5 Polynomial algorithm to detect support constraints $\mathbf{I} = (I, J)$ with non-closed $\mathcal{L}_I$ .

The following sufficient condition for non-closedness is based on the existence in the support constraint of  $2 \times 2$  blocks sharing the essential properties of a  $2 \times 2$  LU support constraint.

**Lemma B.8.** *Consider a pair  $\mathbf{I} = (I, J) \in \{0, 1\}^{m \times r} \times \{0, 1\}^{r \times n}$  of support constraints for the weight matrices of one-hidden-layer neural network. If there exists four indices  $1 \leq i_1, i_2 \leq m, 1 \leq j_1, j_2 \leq n$  and two indices  $k \neq l, 1 \leq k, l \leq r$  such that:*

1. *For each pair  $(i, j) \in \{(i_1, j_1), (i_1, j_2), (i_2, j_1)\}$  we have:*

$$(i, j) \in \text{supp}(I[:, k]J[k, :]) \text{ and } (i, j) \notin \text{supp}(I[:, \ell]J[\ell, :]), \forall \ell \neq k.$$

2. *The pair  $(i_2, j_2)$  belongs to  $\text{supp}(I[:, k]J[k, :])$  and to  $\text{supp}(I[:, l]J[l, :])$ .*

then  $\mathcal{L}_I$  is non-closed.

*Proof.* First, it is easy to see that the assumptions of this lemma are equivalent to those of [18, Theorem 4.20] since  $\text{supp}(I[:, k]J[k, :])$  is precisely the  $k$ th rank-one support of the pair  $(I, J)$  [18, Definition 3.1]. Without loss of generality, one can assume that  $i_1, j_1 = 1, i_2, j_2 = 2$  and  $k = 1, l = 2$ . We will prove that  $\mathbf{A} \in \overline{\mathcal{L}}_I \setminus \mathcal{L}_I$  where

$$\mathbf{A} := \begin{pmatrix} \mathbf{A}' & \mathbf{0} \\ \mathbf{0} & \mathbf{0} \end{pmatrix} \in \mathbb{R}^{m \times n}, \text{ with } \mathbf{A}' := \begin{pmatrix} 0 & 1 \\ 1 & 0 \end{pmatrix} \in \mathbb{R}^{2 \times 2}.$$

This can be shown in two steps:

1. Proof that  $\mathbf{A} \in \overline{\mathcal{L}_I}$ : For any  $\epsilon > 0$ , consider two factors:

$$\mathbf{X}_\epsilon = \begin{pmatrix} \mathbf{X}'_\epsilon & \mathbf{0} \\ \mathbf{0} & \mathbf{0} \end{pmatrix}, \mathbf{Y}_\epsilon = \begin{pmatrix} \mathbf{Y}'_\epsilon & \mathbf{0} \\ \mathbf{0} & \mathbf{0} \end{pmatrix}$$

where  $\mathbf{X}'_\epsilon, \mathbf{Y}'_\epsilon \in \mathbb{R}^{2 \times 2}$  respect the support constraints corresponding to the **LU** architecture. It is not hard to see that such a construction of  $(\mathbf{X}_\epsilon, \mathbf{Y}_\epsilon)$  satisfies the support constraints  $(I, J)$  (due to the assumption of the lemma and the value of indices). Moreover, we also have:

$$\|\mathbf{A} - \mathbf{X}_\epsilon \mathbf{Y}_\epsilon\|_F = \|\mathbf{A}' - \mathbf{X}'_\epsilon \mathbf{Y}'_\epsilon\|_F$$

Thus, to have  $\|\mathbf{A} - \mathbf{X}_\epsilon \mathbf{Y}_\epsilon\|_F \leq \epsilon$ , it is sufficient to choose a pair of factors  $(\mathbf{X}'_\epsilon, \mathbf{Y}'_\epsilon)$  respecting the **LU** architecture of size  $2 \times 2$  such that  $\|\mathbf{A}' - \mathbf{X}'_\epsilon \mathbf{Y}'_\epsilon\|_F \leq \epsilon$ . Such a pair exists, since the set of matrices admitting the exact **LU** decomposition is dense in  $\mathbb{R}^{2 \times 2}$ . This holds for any  $\epsilon > 0$ . Therefore,  $\mathbf{A} \in \overline{\mathcal{L}_I}$ .

2. Proof that  $\mathbf{A} \notin \mathcal{L}_I$ : Assume there exist a pair of factors  $(\mathbf{X}, \mathbf{Y})$  whose product  $\mathbf{XY} = \mathbf{A}$  and supports are included in  $(I, J)$ . Due to the assumptions on the pairs  $(i_1, j_1), (i_1, j_2), (i_2, j_1)$ , we must have:

$$\begin{cases} \mathbf{X}[1, 1]\mathbf{Y}[1, 1] &= \mathbf{A}[1, 1] = 0 \\ \mathbf{X}[2, 1]\mathbf{Y}[1, 1] &= \mathbf{A}[2, 1] = 1 \\ \mathbf{X}[1, 1]\mathbf{Y}[1, 2] &= \mathbf{A}[1, 2] = 1. \end{cases}$$

It is easy to see that it is impossible. Therefore,  $\mathbf{A} \notin \mathcal{L}_I$ .  $\square$

Given a pair of support constraints  $\mathbf{I}$ , it is possible to check in time polynomial in  $m, r, n$  whether the conditions of Lemma B.8 hold. A brute force algorithm has complexity  $O(m^2 n^2 r)$ . A more clever implementation with careful book-marking can reduce this complexity to  $O(\min(m, n) m n r)$ .

## C Proofs for results in Section 4

### C.1 Proof of Theorem 4.1

In fact, Theorem 4.1 is a corollary of Lemma B.1. Thus, we will give a proof for Lemma B.1 in the following.

*Proof of Lemma B.1* Since  $\mathbf{A} \in \overline{\mathcal{L}_I} \setminus \mathcal{L}_I \subseteq \mathbb{R}^{N_L \times N_0}$ , we have:

1.  $\mathbf{A} \notin \mathcal{L}_I$ .
2. There exists a sequence  $\{(\mathbf{X}_i^k)_{i=1}^L\}_{k \in \mathbb{N}}$  such that  $\lim_{k \rightarrow \infty} \|\mathbf{X}_L^k \dots \mathbf{X}_1^k - \mathbf{A}\| = 0$  for any norm defined on  $\mathbb{R}^{N_0}$ .

We will prove that the linear function:  $f(x) := \mathbf{A}x$  satisfies  $f \in \overline{\mathcal{F}_I} \setminus \mathcal{F}_I$  (where  $\overline{\mathcal{F}_I}$  is the closure of  $\mathcal{F}_I$  in  $(C^0(\Omega), \|\cdot\|_\infty)$ , that is to say  $f$  is not the realization of any neural network but it is the uniform limit of the realizations of a sequence of neural networks). Firstly, we prove that  $f \notin \mathcal{F}_I$ . For the sake of contradiction, assume there exists  $\theta = (\mathbf{W}_i, \mathbf{b}_i)_{i=1}^L \in \mathcal{N}_I$  such that  $\mathcal{R}_\theta = f$ . Since  $\mathcal{R}_\theta$  is the realization of a ReLU neural network, it is a continuous piecewise linear function. Therefore, since  $\Omega$  has non-empty interior, there exist a non-empty open subset  $\Omega'$  of  $\mathbb{R}^d$  such that  $\Omega' \subseteq \Omega$  and  $\mathcal{R}_\theta$  is linear on  $\Omega'$ , i.e., there are  $\mathbf{A}' \in \mathbb{R}^{N_L \times N_0}$ ,  $\mathbf{b}' \in \mathbb{R}^{N_L}$  such that  $\mathcal{R}_\theta(x) = \mathbf{A}'x + \mathbf{b}'$ ,  $\forall x \in \Omega'$ . Since  $f = \mathcal{R}_\theta$ , we have:  $\mathbf{A}' = \mathbf{A}$  and also equal to the Jacobian matrix of  $\mathcal{R}_\theta$  on  $\Omega'$ . Using Lemma B.3 and the fact that  $\mathbf{A} \notin \mathcal{L}_I$ , we conclude that  $f \notin \mathcal{F}_I$ .

There remains to construct a sequence  $\{\theta^k\}_{k \in \mathbb{N}}$ ,  $\theta^k = (\mathbf{W}_i^k, \mathbf{b}_i^k)_{i=1}^L \in \mathcal{N}_I$  such that  $\lim_{k \rightarrow \infty} \|\mathcal{R}_{\theta^k} - f\|_\infty = 0$ . We will rely on the sequence  $\{(\mathbf{X}_i^k)_{i=1}^L\}_{k \in \mathbb{N}}$  for our construction. Given  $k \in \mathbb{N}$  we simply define the weight matrices as  $\mathbf{W}_i^k = \mathbf{X}_i^k$ ,  $1 \leq i \leq L$ . The biases are built recursively. Starting from  $c_1^k := \sup_{x \in \Omega} \|\mathbf{W}_1^k x\|_\infty$  and  $\mathbf{b}_1^k := c_1^k \mathbf{1}_{N_1}$ , we iteratively define for  $2 \leq i \leq L - 1$ :

$$\begin{aligned} \gamma_{i-1}^k(x) &:= \mathbf{W}_{i-1}^k x + \mathbf{b}_{i-1}^k \\ c_i^k &:= \sup_{x \in \Omega} \|\gamma_{i-1}^k \circ \dots \circ \gamma_1^k(x)\|_\infty \\ \mathbf{b}_i^k &:= c_i^k \mathbf{1}_{N_i}. \end{aligned}$$

The boundedness of  $\Omega$  ensures that  $c_i^k$  is well-defined with a finite supremum. For  $i = L$  we define:

$$\mathbf{b}_L^k = - \sum_{i=1}^{L-1} \left( \prod_{j=i+1}^L \mathbf{W}_j \right) \mathbf{b}_i^k.$$

We will prove that  $\mathcal{R}_{\theta^k}(x) = (\mathbf{X}_L^k \dots \mathbf{X}_1^k) x, \forall x \in \Omega$ . As a consequence, it is immediate that:

$$\begin{aligned} \lim_{k \rightarrow \infty} \|\mathcal{R}_{\theta^k} - f\|_\infty &= \lim_{k \rightarrow \infty} \sup_{x \in \Omega} \|\mathcal{R}_{\theta^k}(x) - f(x)\|_2 \\ &\leq \lim_{k \rightarrow \infty} \|\mathbf{X}_L^k \dots \mathbf{X}_1^k - \mathbf{A}\|_{2 \rightarrow 2} \sup_{x \in \Omega} \|x\|_2 = 0 \end{aligned}$$

where we used that all matrix norms are equivalent and denoted  $\|\cdot\|_{2 \rightarrow 2}$  the operator norm associated to Euclidean vector norms. Back to the proof that  $\mathcal{R}_{\theta^k}(x) = (\mathbf{X}_L^k \dots \mathbf{X}_1^k) x, \forall x \in \Omega$ , due to our choice of  $c_i^k$ , we have for  $2 \leq i \leq L-1$ :

$$\gamma_{i-1}^k \circ \dots \circ \gamma_1^k(x) \geq 0, \forall x \in \Omega$$

where  $\geq$  is taken in coordinate-wise manner. Therefore, an easy induction yields:

$$\begin{aligned} \mathcal{R}_{\theta^k}(x) &= \gamma_L^k \circ \sigma \circ \gamma_{L-1}^k \circ \dots \circ \sigma \circ \gamma_1^k(x) \\ &= \gamma_L^k \circ \gamma_{L-1}^k \circ \dots \circ \gamma_1^k(x) \\ &= \mathbf{W}_L^k (\dots (\mathbf{W}_2^k (\mathbf{W}_1^k x + \mathbf{b}_1^k) + \mathbf{b}_2^k) \dots) + \mathbf{b}_L^k \\ &= (\mathbf{X}_L^k \dots \mathbf{X}_1^k) x + \sum_{i=1}^{L-1} \left( \prod_{j=i+1}^L \mathbf{W}_j \right) \mathbf{b}_i^k - \sum_{i=1}^{L-1} \left( \prod_{j=i+1}^L \mathbf{W}_j \right) \mathbf{b}_i^k \\ &= (\mathbf{X}_L^k \dots \mathbf{X}_1^k) x. \end{aligned}$$

739

□

## 740 C.2 Proof of Theorem 4.2

741 Given the involvement of Theorem 4.2, we decompose its proof and present it in two subsections: the  
742 first one establishes general results that do not use the assumption of Theorem 4.2. The second one  
743 combines the established results with the assumption of Theorem 4.2 to provide a full proof.

### 744 C.2.1 Properties of the limit function of fixed support one-hidden-layer NNs

745 The main results of this parts are summarized in Lemma C.2 and Lemma C.3. It is important to  
746 emphasize that all results in this section do *not* make any assumption on  $\mathbf{I}$ .

747 We first introduce the following technical results.

748 **Lemma C.1** (Normalization of the rows of the first layer [26]). *Consider  $\Omega$  a bounded subset of  $\mathbb{R}^{N_0}$ .  
749 Given any  $\theta = \{(\mathbf{W}_i, \mathbf{b}_i)_{i=1}^2\} \in \mathcal{N}_{\mathbf{I}}$  and any norm  $\|\cdot\|$  on  $\mathbb{R}^{N_0}$ , there exists  $\tilde{\theta} := \{(\tilde{\mathbf{W}}_i, \tilde{\mathbf{b}}_i)_{i=1}^2\} \in$   
750  $\mathcal{N}_{\mathbf{I}}$  such that the matrix  $\tilde{\mathbf{W}}_1$  has unit norm rows,  $\|\tilde{\mathbf{b}}_1\|_\infty \leq C := \sup_{x \in \Omega} \sup_{\|u\| \leq 1} \langle u, x \rangle$  and  
751  $\mathcal{R}_\theta(x) = \mathcal{R}_{\tilde{\theta}}(x), \forall x \in \Omega$ .*

752 *Proof.* We report this proof for self-completeness of this work. It is *not* a contribution, as it merely  
753 combines ideas from the proof of [26, Lemma D.2] and [26, Theorem 3.8, Steps 1-2].

754 We first show that for each set of weights  $\theta \in \mathcal{N}_{\mathbf{I}}$  we can find another set of weights  $\theta' =$   
755  $\{(\mathbf{W}'_i, \mathbf{b}'_i)_{i=1}^2\} \in \mathcal{N}_{\mathbf{I}}$  such that  $\mathcal{R}_\theta = \mathcal{R}_{\theta'}$  on  $\mathbb{R}^{N_0}$  and  $\mathbf{W}'_1$  has unit norm rows. Note that  
756  $\|\mathbf{b}'_1\|_\infty$  can be larger than  $C$ . Indeed, given  $\theta \in \mathcal{N}_{\mathbf{I}}$ , the function  $\mathcal{R}_\theta$  can be written as:  
757  $\mathcal{R}_\theta : x \in \mathbb{R}^{N_0} \mapsto \sum_{j=1}^{N_1} h_j(x) + \mathbf{b}_2$  where  $h_j(x) = \mathbf{W}_2[:, j] \sigma(\mathbf{W}_1[j, :]x + \mathbf{b}_1[j])$  denotes the  
758 contribution of the  $j$ th hidden neuron. For hidden neurons corresponding to nonzero rows of  $\mathbf{W}_1^k$ ,  
759 we can rescale the rows of  $\mathbf{W}_1^k$ , the columns of  $\mathbf{W}_2^k$  and  $\mathbf{b}_1^k$  such that the realization of  $h_j$  is invari-  
760 ant. This is due to the fact that  $\mathbf{w}_2 \sigma(\mathbf{w}_1^\top x + b) = \|\mathbf{w}_1\| \mathbf{w}_2 \sigma((\mathbf{w}_1 / \|\mathbf{w}_1\|)^\top x + (b / \|\mathbf{w}_1\|))$  for any  
761  $\mathbf{w}_1 \neq \mathbf{0} \in \mathbb{R}^{N_0}, \mathbf{w}_2 \in \mathbb{R}^{N_2}, b \in \mathbb{R}$ . Neurons corresponding to null rows of  $\mathbf{W}_1^k$  are handled similarly,

in an iterative manner, by setting them to an arbitrary normalized row, setting the corresponding column of  $\mathbf{W}_2^k$  to zero, and changing the bias  $\mathbf{b}_2^k$  to keep the function  $\mathcal{R}_\theta$  unchanged on  $\mathbb{R}^{N_0}$ , using that  $\mathbf{w}_2\sigma(\mathbf{0}^\top x + b) + \mathbf{b}_2 = \mathbf{0}\sigma(\mathbf{v}^\top x + b) + (\mathbf{b}_2 + \mathbf{w}_2\sigma(b))$  for any normalized vector  $\mathbf{v} \in \mathbb{R}^{N_0}$ . Thus, we obtain  $\theta'$  whose matrix of the first layer,  $\mathbf{W}_1'$ , has normalized rows and  $\mathcal{R}_\theta = \mathcal{R}_{\theta'}$  on  $\mathbb{R}^{N_0}$ .

To construct  $\tilde{\theta}$  with  $\|\tilde{\mathbf{b}}_1\|_\infty \leq C$  we see that, by definition of  $C$ , if  $\|\mathbf{w}_1\| = 1$  and  $b \geq C$  then

$$\mathbf{w}_1^\top x + b \geq -C + b \geq 0, \quad \forall x \in \Omega. \quad (20)$$

Thus, the function  $\mathbf{w}_2\sigma(\mathbf{w}_1^\top x + b) = \mathbf{w}_2(\mathbf{w}_1^\top x + b)$  is linear on  $\Omega$  and

$$\begin{aligned} \mathbf{w}_2\sigma(\mathbf{w}_1^\top x + b) + \mathbf{b}_2 &= \mathbf{w}_2(\mathbf{w}_1^\top x + C) + ((b - C)\mathbf{w}_2 + \mathbf{b}_2) \\ &= \mathbf{w}_2\sigma(\mathbf{w}_1^\top x + C) + ((b - C)\mathbf{w}_2 + \mathbf{b}_2) \end{aligned}$$

Thus, for any hidden neuron with a bias exceeding  $C$ , the bias can be saturated to  $C$  by changing accordingly the output bias  $\mathbf{b}_2$ , keeping the function  $\mathcal{R}_\theta$  unchanged on the bounded domain  $\Omega$  (but not on the whole space  $\mathbb{R}^{N_0}$ ). Hidden neurons with a bias  $b \leq -C$  can be similarly modified. Sequentially saturating each hidden neuron yields  $\tilde{\theta}$  which satisfies all conditions of Lemma C.1.  $\square$

**Lemma C.2.** Consider  $\Omega$  a bounded subset of  $\mathbb{R}^{N_0}$ , for any  $\mathbf{I} = (I_2, I_1)$ , given a continuous function  $f \in \overline{\mathcal{F}_\mathbf{I}(\Omega)}$ , there exists a sequence  $\{\theta^k\}_{k \in \mathbb{N}}$ ,  $\theta^k = (\mathbf{W}_1^k, \mathbf{b}_1^k)_{i=1}^2 \in \mathcal{N}_\mathbf{I}$  such that:

1. The sequence  $\mathcal{R}_{\theta^k}$  admits  $f$  as its uniform limit, i.e.,  $\lim_{k \rightarrow \infty} \|\mathcal{R}_{\theta^k} - f\|_\infty = 0$ .
2. The sequence  $\{(\mathbf{W}_1^k, \mathbf{b}_1^k)\}_{k \in \mathbb{N}}$  has a finite limit  $(\mathbf{W}_1^*, \mathbf{b}_1^*)$  where  $\mathbf{W}_1^*$  has unit norm rows and  $\text{supp}(\mathbf{W}_1^*) \subseteq I_1$ .

*Proof.* Given a function  $f \in \overline{\mathcal{F}_\mathbf{I}(\Omega)}$ , by definition, there exists a sequence  $\{\theta^k\}_{k \in \mathbb{N}}$ ,  $\theta^k \in \mathcal{N}_\mathbf{I}$   $\forall k \in \mathbb{N}$  such that  $\lim_{k \rightarrow \infty} \|\mathcal{R}_{\theta^k} - f\|_\infty = 0$ . We can assume that  $\mathbf{W}_1^k$  has normalized rows and  $\mathbf{b}_1^k$  is bounded using Lemma C.1. We can also assume WLOG that the parameters of the first layer (i.e.  $\mathbf{W}_1^k, \mathbf{b}_1^k$ ) have finite limits  $\mathbf{W}_1^*$  and  $\mathbf{b}_1^*$ . Indeed, since both  $\mathbf{W}_1^k$  and  $\mathbf{b}_1^k$  are bounded (by construction from Lemma C.1), there exists a subsequence  $\{\varphi_k\}_{k \in \mathbb{N}}$  such that  $\mathbf{W}_1^{\varphi_k}$  and  $\mathbf{b}_1^{\varphi_k}$  have finite limits and  $\mathcal{R}_{\theta^{\varphi_k}} \rightarrow f$  as  $\mathcal{R}_{\theta^k} \rightarrow f$ . Replacing the sequence  $\{\theta^k\}_{k \in \mathbb{N}}$  by  $\{\theta^{\varphi_k}\}_{k \in \mathbb{N}}$  yields the desired sequence. Finally, since  $\mathbf{W}_1^* = \lim_{k \rightarrow \infty} \mathbf{W}_1^k$ ,  $\mathbf{W}_1^*$  obviously has normalized rows and  $\text{supp}(\mathbf{W}_1^*) \subseteq I_1$ .  $\square$

**Definition C.1.** Consider  $\Omega$  bounded subset of  $\mathbb{R}^d$ , a function  $f \in \overline{\mathcal{F}_\mathbf{I}(\Omega)}$  and a sequence  $\{\theta^k\}_{k \in \mathbb{N}}$  as given by Lemma C.2. We define  $(a_i, b_i) = (\mathbf{W}_1^*[i, :], \mathbf{b}_1^*[i])$  the limit parameters of the first layer corresponding to the  $i$ th neuron. We partition the set of neurons into two subsets (one of them may be empty):

1. Set of active neurons:  $J := \{i \mid (\exists x \in \Omega, a_i x + b_i > 0) \wedge (\exists x \in \Omega, a_i x + b_i < 0)\}$ .
2. Set of non-active neurons:  $\bar{J} = \llbracket N_1 \rrbracket \setminus J$ .

For  $i, j \in J$ , we write  $i \simeq j$  if  $(\mathbf{W}_1^*[i, :], \mathbf{b}_1^*[i]) = \pm(\mathbf{W}_1^*[j, :], \mathbf{b}_1^*[j])$ . The relation  $\simeq$  is an equivalence relation.

We define  $(J_\ell)_{\ell=1, \dots, r}$  the equivalence classes induced by  $\simeq$  and we use  $(\alpha_\ell, \beta_\ell) := (a_i, b_i)$  for some  $i \in J_\ell$  as the representative limit of the  $\ell$ th equivalence class. For  $i \in J_\ell$ , we have:  $(a_i, b_i) = \epsilon_i(\alpha_\ell, \beta_\ell)$ ,  $\epsilon_i \in \{\pm 1\}$ . We define  $J_\ell^+ = \{i \in J_\ell \mid \epsilon_i = 1\} \neq \emptyset$  and  $J_\ell^- = J_\ell \setminus J_\ell^+$ .

For each equivalence class  $J_\ell$ , define  $H_\ell := \{x \in \Omega \mid \alpha_\ell x + \beta_\ell = 0\}$  the boundary generated by neurons in  $J_\ell$  and the positive (resp. negative) half-space partitioned by  $H_\ell$ ,  $H_\ell^+ := \{x \in \Omega \mid \alpha_\ell x + \beta_\ell > 0\}$  (resp.  $H_\ell^- := \{x \in \Omega \mid \alpha_\ell x + \beta_\ell < 0\}$ ). For any  $\epsilon > 0$  we also define the open half-spaces  $H_\ell^{(\epsilon, +)} := \{x \in \mathbb{R}^d \mid \alpha_\ell^\top x + \beta_\ell > \epsilon\}$  and  $H_\ell^{(\epsilon, -)} := \{x \in \mathbb{R}^d \mid \alpha_\ell^\top x + \beta_\ell < -\epsilon\}$ .

Definition C.1 groups neurons sharing the same “linear boundary” (or “singular hyperplane” as in [26]). This concept is related to “twin neurons” [28], which also groups neurons with the same active zone. This partition somehow allows us to treat classes independently. Observe also that

$$\text{supp}(\alpha_\ell) \subseteq \bigcap_{i \in J_\ell} I_1[i, :], \forall 1 \leq \ell \leq r. \quad (21)$$

**Definition C.2** (Contribution of an equivalence class). *In the setting of Definition C.1 we define the contribution of the  $i$ th neuron  $1 \leq i \leq N_1$  (resp. of the  $\ell$ th ( $1 \leq \ell \leq r$ ) equivalence class) of  $\theta^k$  as:*

$$\begin{aligned} h_i^k : \mathbb{R}^{N_0} &\mapsto \mathbb{R}^{N_2} : x \mapsto \mathbf{W}_2^k[:, i] \sigma(\mathbf{W}_1^k[i, :]x + \mathbf{b}_1^k[i]) , \\ g_\ell^k : \mathbb{R}^{N_0} &\mapsto \mathbb{R}^{N_2} : x \mapsto \sum_{i \in J_\ell} h_i^k(x) . \end{aligned}$$

**Lemma C.3.** *Consider  $\Omega = [-B, B]^d$ ,  $f \in \overline{\mathcal{F}_1(\Omega)}$  and a sequence  $\{\theta^k\}_{k \in \mathbb{N}}$  as given by Lemma C.2 and  $\alpha_\ell, \beta_\ell, 1 \leq \ell \leq r, \epsilon_i, i \in J$  as given by Definition C.1. There exist some  $\gamma_\ell, \mathbf{b} \in \mathbb{R}^{N_2}, \mathbf{A} \in \mathbb{R}^{N_2 \times N_0}$  such that:*

$$f(x) = \sum_{\ell=1}^r \gamma_\ell \sigma(\alpha_\ell x + \beta_\ell) + \mathbf{A}x + \mathbf{b} \quad \forall x \in \Omega \quad (22)$$

$$\lim_{k \rightarrow \infty} \sum_{i \in J_\ell} \epsilon_i \mathbf{W}_2^k[:, i] \mathbf{W}_1^k[i, :] = \gamma_\ell \alpha_\ell, \quad \forall 1 \leq \ell \leq r \quad (23)$$

$$\lim_{k \rightarrow \infty} \sum_{i \in J_\ell} \epsilon_i \mathbf{b}_1^k[i] \mathbf{W}_2^k[:, i] = \gamma_\ell \beta_\ell, \quad \forall 1 \leq \ell \leq r \quad (24)$$

$$\text{supp}(\gamma_\ell) \subseteq \bigcup_{i \in J_\ell} I_2[:, i], \quad \forall 1 \leq \ell \leq r \quad (25)$$

801 *Proof.* The proof is divided into three parts: We first show that there exist  $\gamma_\ell, \mathbf{b} \in \mathbb{R}^{N_2}$  and  
802  $\mathbf{A} \in \mathbb{R}^{N_2 \times N_0}$  such that Equation (22) holds. The last two parts will be devoted to prove that  
803 equations (23) - (25) hold.

804 **1. Proof of Equation (22):** Our proof is based on a result of [26], which deals with the case of a  
805 scalar output (i.e.,  $N_2 = 1$ ). It is proved in [26, Theorem 3.8, Steps 3, 6, 7] and states the following:

806 **Lemma C.4** (Analytical form of a limit function with scalar output [26]). *In case  $N_2 = 1$  (i.e., output  
807 dimension equal to one), consider  $\Omega = [-B, B]^d$ , a scalar-valued function  $f : \Omega \mapsto \mathbb{R}$ ,  $f \in \overline{\mathcal{F}_1(\Omega)}$   
808 and a sequence as given by Lemma C.2, there exist  $\mu \in \mathbb{R}^{N_0}, \gamma_\ell, \nu \in \mathbb{R}$  such that:*

$$f(x) = \sum_{\ell=1}^r \gamma_\ell \sigma(\alpha_\ell x + \beta_\ell) + \mu^\top x + \nu, \quad \forall x \in \Omega \quad (26)$$

Back to our proof, one can write  $f = (f_1, \dots, f_{N_2})$  where  $f_j : \Omega \subseteq \mathbb{R}^{N_0} \mapsto \mathbb{R}$  is the function  $f$  restricted to the  $j$ th coordinate. Clearly,  $f_j$  is also a uniform limit on  $\Omega$  of  $\{\mathcal{R}_{\tilde{\theta}^k}\}_{k \in \mathbb{N}}$  for a sequence  $\{\tilde{\theta}^k\}_{k \in \mathbb{N}}$  which shares the same  $\mathbf{W}_1^k$  with  $\{\theta^k\}_{k \in \mathbb{N}}$  but  $\tilde{\mathbf{W}}_2^k$  is the  $j$ th row of  $\mathbf{W}_2^k$ . Therefore,  $\{\tilde{\theta}^k\}_{k \in \mathbb{N}}$  also satisfies the assumptions of Lemma C.4, which gives us:

$$f_j(x) = \sum_{\ell=1}^r \gamma_{\ell,j} \sigma(\alpha_\ell x + \beta_\ell) + \mu_j^\top x + \nu_j, \quad \forall x \in \Omega$$

for some  $\mu_j \in \mathbb{R}^{N_0}, \gamma_{\ell,j}, \nu_j \in \mathbb{R}$ . Note that  $\alpha_\ell, \beta_\ell$  and  $r$  are not dependent on the index  $j$  since they are defined directly from the considered sequence. Therefore, the function  $f$  (which is the concatenation of  $f_j$  coordinate by coordinate) is:

$$f(x) = \sum_{\ell=1}^r \gamma_\ell \sigma(\alpha_\ell x + \beta_\ell) + \mathbf{A}x + \mathbf{b}, \quad \forall x \in \Omega$$

809 with  $\gamma_\ell = \begin{pmatrix} \gamma_{\ell,1} \\ \vdots \\ \gamma_{\ell,N_2} \end{pmatrix}, \mathbf{A} = \begin{pmatrix} \mu_1^\top \\ \vdots \\ \mu_{N_2}^\top \end{pmatrix}, \mathbf{b} = \begin{pmatrix} \nu_1 \\ \vdots \\ \nu_{N_2} \end{pmatrix}.$

810 **2. Proof for Equations (23)-(24):** With the construction of  $\gamma$ , we will prove Equation (23) and  
811 Equation (24). We consider an arbitrary  $1 \leq \ell \leq r$ . Denoting  $\Omega^\circ$  the interior of  $\Omega$  and  $\tilde{H}_\ell :=$   
812  $\{x \in \Omega \mid \alpha_\ell x + \beta_\ell = 0\}$  the hyperplane defined by the input weights and bias of the  $\ell$ -th class of

neurons, we take a point  $x' \in (\Omega^\circ \cap H_\ell) \setminus \bigcup_{p \neq \ell} H_p$  and a fixed scalar  $r > 0$  such that the open ball  $\mathcal{B}(x', r) \subseteq \Omega^\circ \setminus \bigcup_{p \neq \ell} H_p$ . Notice that  $x'$  is well-defined due to the definition of  $J$  (Definition C.1). In addition,  $r$  also exists because  $\Omega^\circ \setminus \bigcup_{p \neq \ell} H_p$  is an open set. Thus, there exists two constants  $0 < \delta < B$  and  $\epsilon > 0$  such that:

- (a)  $\mathcal{B}(x', r) \subseteq [-(B - \delta), B - \delta]^d$ .
- (b) For each  $p \neq \ell$ , the ball  $\mathcal{B}(x', r)$  is either included in the half-space  $H_p^{(\epsilon, +)} := \{x \in \mathbb{R}^d \mid \alpha_p^\top x + \beta_p > \epsilon\}$  or in the half-space  $H_p^{(\epsilon, -)} := \{x \in \mathbb{R}^d \mid \alpha_p^\top x + \beta_p < -\epsilon\}$ .
- (c) The intersection of  $\mathcal{B}(x', r)$  with  $H_\ell^{(\epsilon, +)}$  and  $H_\ell^{(\epsilon, -)}$  are not empty.

For the remaining of the proof, we will use Lemma C.5, another result taken from [26]. We only state the lemma. Its formal proof can be found in the proof of [26] Theorem 3.8, Steps 4-5].

**Lemma C.5** (Affine linear area [26]). *Given a sequence  $\{\theta^k\}_{k \in \mathbb{N}}$  satisfying the second condition of Lemma C.2 we have:*

- (a) For any  $0 < \delta < B$ , there exists a constant  $\kappa_\delta$  such that  $\forall i \in \bar{J}$ ,  $h_i^k$  are affine linear on  $[-(B - \delta), B - \delta]^{N_0}$  for all  $k \geq \kappa_\delta$ .
- (b) For any  $\epsilon > 0$ , there exists a constant  $\kappa_\epsilon$  such that for each  $1 \leq \ell \leq r$  and each  $i \in J_\ell$  the function  $h_i^k$  is affine linear on  $H_\ell^{(\epsilon, +)} \cup H_\ell^{(\epsilon, -)}$  for all  $k \geq \kappa_\epsilon$ .

The lemma implies the existence of  $K = \max(\kappa_\delta, \kappa_\epsilon)$  such that for all  $k \geq K$ , we have:

$$\sum_{p \neq \ell} g_p^k(x) = \mathbf{B}^k x + \nu^k, \quad \forall x \in \mathcal{B}(x', r),$$

for some  $\mathbf{B}^k \in \mathbb{R}^{N_2 \times N_0}$ ,  $\nu^k \in \mathbb{R}^{N_2}$ . Therefore, for  $k \geq K$ , we have:

$$\begin{aligned} \mathcal{R}_{\theta^k}(x) &= \mathbf{B}^k x + \nu^k + \sum_{i \in J_\ell^+} \mathbf{W}_2^k[:, i] (\mathbf{W}_1^k[i, :] x + \mathbf{b}_1^k[i]), \quad \forall x \in \mathcal{B}(x', r) \cap H_\ell^{(\epsilon, +)} \\ \mathcal{R}_{\theta^k}(x) &= \mathbf{B}^k x + \nu^k + \sum_{i \in J_\ell^-} \mathbf{W}_2^k[:, i] (\mathbf{W}_1^k[i, :] x + \mathbf{b}_1^k[i]), \quad \forall x \in \mathcal{B}(x', r) \cap H_\ell^{(\epsilon, -)}. \end{aligned}$$

Since we proved that  $f$  has the form Equation (22), there exist  $\mathbf{C} \in \mathbb{R}^{N_2 \times N_0}$ ,  $\mu \in \mathbb{R}^{N_2}$  such that

$$\begin{aligned} f(x) &= (\mathbf{C} + \gamma_\ell \alpha_\ell) x + (\mu + \gamma_\ell \beta_\ell), \quad \forall x \in \mathcal{B}(x', r) \cap H_\ell^{(\epsilon, +)} \\ f(x) &= \mathbf{C} x + \mu, \quad \forall x \in \mathcal{B}(x', r) \cap H_\ell^{(\epsilon, -)} \end{aligned}$$

As both  $\mathcal{B}(x', r) \cap H_\ell^{(\epsilon, +)}$  and  $\mathcal{B}(x', r) \cap H_\ell^{(\epsilon, -)}$  are open sets, and given our hypothesis of uniform convergence of  $\mathcal{R}_{\theta^k} \rightarrow f$ , we obtain,

$$\begin{aligned} \lim_{k \rightarrow \infty} \mathbf{B}^k + \sum_{i \in J_\ell^+} \mathbf{W}_2^k[:, i] \mathbf{W}_1^k[i, :] &= \mathbf{C} + \gamma_\ell \alpha_\ell \\ \lim_{k \rightarrow \infty} \mathbf{B}^k + \sum_{i \in J_\ell^-} \mathbf{W}_2^k[:, i] \mathbf{W}_1^k[i, :] &= \mathbf{C} \\ \lim_{k \rightarrow \infty} \nu^k + \sum_{i \in J_\ell^+} \mathbf{b}_1^k[i] \mathbf{W}_2^k[:, i] &= \mu + \gamma_\ell \beta_\ell \\ \lim_{k \rightarrow \infty} \nu^k + \sum_{i \in J_\ell^-} \mathbf{b}_1^k[i] \mathbf{W}_2^k[:, i] &= \mu. \end{aligned} \tag{27}$$

Proof for Equation (27) can be found in Appendix C.4. Equations (23) and (24) follow directly from Equation (27).

**3. Proof of Equation (25):** Since  $\alpha_\ell \neq 0$  (remember that  $\|\alpha_\ell\| = 1$ ), this is an immediate consequence of Equation (23) as each vector  $\mathbf{W}_2^k[:, j]$ ,  $j \in J_\ell$  is supported in  $I_2[:, j] \subseteq \bigcup_{i \in J_\ell} I_2[:, i]$ .  $\square$

835 We state an immediate corollary of Lemma C.3 which characterizes the limit of the sequence of  
 836 contributions  $\{g_\ell^k\}_{k \in \mathbb{N}}$  of the  $\ell$ th equivalence class with  $|J_\ell| = 1$ .

837 **Corollary C.1.** Consider  $f \in \overline{\mathcal{F}_1([-B, B]^d)}$  that admits the analytical form in Equation (22), a  
 838 sequence  $\{\theta^k\}_{k \in \mathbb{N}}$  as given by Lemma C.2 and Definition C.1. For all singleton equivalence classes  
 839  $J_\ell = \{i\}$ ,  $1 \leq \ell \leq r$ , we have  $\lim_{k \rightarrow \infty} \mathbf{W}_2^k[:, i] = \gamma_\ell$  and  $\lim_{k \rightarrow \infty} \|h_\ell^k - \gamma_\ell \sigma(\alpha_\ell^\top x + \beta_\ell)\|_\infty = 0$ .

*Proof.* We first prove that  $\mathbf{W}_2^k[:, i]$  has a finite limit. In fact, applying the second point of Lemma C.3  
 for  $J_\ell = \{i\}$ , we have:

$$\lim_{k \rightarrow \infty} \mathbf{W}_2^k[:, i] \mathbf{W}_1^k[i, :] = \gamma_\ell \alpha_\ell$$

840 where  $\gamma_\ell, \alpha_\ell$  are defined in Lemma C.3. Because  $\lim_{k \rightarrow \infty} \mathbf{W}_1^k[i, :] = \alpha_\ell$  and  $\|\alpha_\ell\|_2 = 1$ , it follows  
 841 that  $\gamma_\ell = \lim_{k \rightarrow \infty} \mathbf{W}_2^k[:, i]$ . To conclude, since we also have  $\beta_\ell = \lim_{k \rightarrow \infty} \mathbf{b}_1^k[i]$ , we obtain  
 842  $h_\ell^k(\cdot) = \mathbf{W}_2^k[\ell, :] \sigma(\mathbf{W}_1^k[\ell, :] \cdot + \mathbf{b}_1^k[\ell]) \rightarrow \gamma_\ell \sigma(\alpha_\ell x + \beta_\ell)$  as claimed.  $\square$

843 The nice thing about Corollary C.1 is that the contribution  $g_\ell^k = h_\ell^k$  admits a (uniform) limit  
 844 if  $J_\ell = \{i\}$ . Moreover, this limit is even implementable by using only the  $i$ th neuron because  
 845  $\text{supp}(\alpha_\ell) \subseteq I_1[i, :]$  and  $\text{supp}(\gamma_\ell) \subseteq I_2[:, i]$ .

846 It would be tempting to believe that, for each  $P \in \{\bar{J}\} \cup \{J_\ell \mid \ell = 1, \dots, r\}$  the sequence of  
 847 functions  $\sum_{i \in P} g_i^k(x)$  must admit a limit (when  $k$  tends to  $\infty$ ) and that this limit is implementable  
 848 using only neurons in  $P$ . This would obviously imply that  $\mathcal{F}_1(\Omega)$  is closed. This intuition is however  
 849 wrong. For non-singleton equivalence class (i.e., for cases not covered by Corollary C.1), the limit  
 850 function does not necessarily exist as we show in the following example.

**Example C.1.** Consider the case where  $\mathbf{N} = (1, 3, 1)$  and no support constraint,  $\Omega = [-1, 1]$ , take  
 the sequence  $\{\theta^k\}_{k \in \mathbb{N}}$  which satisfies:

$$\mathbf{W}_1^k = \begin{pmatrix} 1 \\ -1 \\ 1 \end{pmatrix}, \mathbf{b}_1^k = \begin{pmatrix} 0 \\ 0 \\ 1 \end{pmatrix}, \mathbf{W}_2^k = (k \quad -k \quad -k), \mathbf{b}_2^k = k$$

Then for  $x \in \Omega$ , it is easy to verify that  $\mathcal{R}_{\theta^k} = 0$ . Indeed,

$$\begin{aligned} \mathcal{R}_{\theta^k}(x) &= \sum_{i=1}^3 \mathbf{W}_2^k[:, i] \sigma(\mathbf{W}_1^k[i, :] + \mathbf{b}_1^k[i]) + \mathbf{b}_2^k \\ &= k\sigma(x) - k\sigma(-x) - k\sigma(x+1) + k \\ &= k(\sigma(x) - \sigma(-x)) - k(x+1) + k \quad (\text{since } x+1 \geq 0, \forall x \in \Omega) \\ &= kx - k(x+1) + k = 0 \end{aligned}$$

851 Thus, this sequence converges (uniformly) to  $f = 0$ . Moreover, this sequence also satisfies the  
 852 assumptions of Lemma C.2. Using the classification in Definition C.1 we have one class equivalence  
 853  $J_1 = \{1, 2\}$  and  $\bar{J} = \{3\}$ . The function  $g_1^k(x) = k\sigma(x) - k\sigma(-x) = kx$ , however, does not have  
 854 any limit.

## 855 C.2.2 Actual proof of Theorem 4.2

856 Therefore, our analysis cannot treat each equivalence class entirely separately. The last result in  
 857 this section is about a property of the matrix  $\mathbf{A}$  in Equation (22). This is one of our key technical  
 858 contributions in this work.

859 **Lemma C.6.** Consider  $\Omega = [-B, B]^d$ ,  $f \in \overline{\mathcal{F}_1(\Omega)}$  that admits the analytical form in Equa-  
 860 tion (22), a sequence  $\{\theta^k\}_{k \in \mathbb{N}}$  as given by Lemma C.2 then the matrix  $\mathbf{A} \in \overline{\mathcal{L}_1}$  where  
 861  $\mathbf{I}' = (I_2[:, S], I_1[S, :])$ ,  $S = \bar{J} \cup (\cup_{1 \leq \ell \leq r} J_\ell^-)$ ,  $\bar{J}, J_\ell^\pm$  are defined as in Definition C.1).

862 Combining Lemma C.6 and the assumptions of Theorem 4.2, we can prove Theorem 4.2 immediately  
 863 as follow:

*Proof of Theorem 4.2.* Consider  $f \in \overline{\mathcal{F}_1(\Omega)}$ , we deduce that there exists a sequence of  $\{\theta^k\}_{k \in \mathbb{N}}$   
 that satisfies the properties of Lemma C.2. This allows us to define  $\bar{J}$  and equivalence classes



$J_\ell, 1 \leq \ell \leq r$  as well as  $(\alpha_\ell, \beta_\ell)$  as in Definition C.1. Using Lemma C.3, we can also deduce an analytical formula for  $f$  as in Equation (22):

$$f(x) = \sum_{\ell=1}^r \gamma_\ell \sigma(\alpha_\ell x + \beta_\ell) + \mathbf{A}x + \mathbf{b}, \quad \forall x \in \Omega.$$

Finally, Lemma C.6 states that matrix  $\mathbf{A}$  in Equation (22) satisfies:  $\mathbf{A} \in \overline{\mathcal{L}_{\mathbf{I}'}}$  with  $\mathbf{I}' = (I_2[:, S], I_1[S, :])$ , where  $S = \bar{J} \cup (\cup_{\ell=1}^r J_\ell^-)$ . To prove that  $f \in \mathcal{F}_{\mathbf{I}}$ , we construct the parameters  $\theta = \{(\mathbf{W}_i, \mathbf{b}_i)_{i=1}^2\}$  of the limit network as follows:

1. For each  $1 \leq \ell \leq r$ , choose one index  $j \in J_\ell^+$  (which is possible since  $J_\ell^+$  is non-empty). We set:

$$(\mathbf{W}_1[i, :], \mathbf{W}_2[:, i], \mathbf{b}_1[i]) = \begin{cases} (\alpha_\ell, \gamma_\ell, \beta_\ell) & \text{if } i = j \\ (\alpha_\ell, \mathbf{0}, \beta_\ell) & \text{otherwise} \end{cases} \quad (28)$$

This satisfies the support constraint because  $\text{supp}(\alpha_\ell) \subseteq I_1[j, :]$  (by (21))  $\alpha_\ell = \lim_{k \rightarrow \infty} \mathbf{W}_1^k[j, :]$  and  $I_2 = \mathbf{1}_{N_2 \times N_1}$ . This is where we use the first assumption of Theorem 4.2. Without it,  $\text{supp}(\gamma_\ell)$  might not be a subset of  $I_2[:, j]$ .

2. For  $i \in S$ : Since  $\mathbf{A} \in \overline{\mathcal{L}_{\mathbf{I}'}}$  (cf Lemma C.6) and  $\mathcal{L}_{\mathbf{I}'}$  is closed (second assumptions of Theorem 4.2), there exist two matrices  $\hat{\mathbf{W}}_1, \hat{\mathbf{W}}_2$  such that:  $\text{supp}(\hat{\mathbf{W}}_1) \subseteq I_1[:, S], \text{supp}(\hat{\mathbf{W}}_2) \subseteq I_2[S, :]$ , and  $\mathbf{A} = \hat{\mathbf{W}}_2 \hat{\mathbf{W}}_1$ . We set:

$$(\mathbf{W}_1[i, :], \mathbf{W}_2[:, i], \mathbf{b}_1[i]) = (\hat{\mathbf{W}}_1[i, :], \hat{\mathbf{W}}_2[:, i], C) \quad (29)$$

where  $C = \sup_{x \in \Omega} \|\hat{\mathbf{W}}_1 x\|_\infty$ . This satisfies the support constraints  $\mathbf{I}$  due to our choice of  $\hat{\mathbf{W}}_1, \hat{\mathbf{W}}_2$ . The choice of  $C$  ensures that the function  $h_i(x) := \mathbf{W}_2[:, i] \sigma(\mathbf{W}_1[i, :]x + \mathbf{b}_1[i])$  is linear on  $\Omega$ .

3. For  $\mathbf{b}_2$ : Let  $\mathbf{b}_2 = \mathbf{b} - C \left( \sum_{i \in S} \hat{\mathbf{W}}_2[:, i] \right)$  ( $\mathbf{b}$  is the bias in Equation (22)).

Verifying  $\mathcal{R}_\theta = f$  on  $\Omega$  is thus trivial since:

$$\begin{aligned} \mathcal{R}_\theta(x) &= \sum_{i=1}^{N_1} \mathbf{W}_2[:, i] \sigma(\mathbf{W}_1[i, :]x + \mathbf{b}_1[i]) + \mathbf{b}_2 \\ &= \sum_{i \notin S} \mathbf{W}_2[:, i] \sigma(\mathbf{W}_1[i, :]x + \mathbf{b}_1[i]) + \sum_{i \in S} \mathbf{W}_2[:, i] \sigma(\mathbf{W}_1[i, :]x + \mathbf{b}_1[i]) + \mathbf{b}_2 \\ &= \sum_{\ell=1}^r \gamma_\ell \sigma(\alpha_\ell x + \beta_\ell) + \sum_{j \in S} \hat{\mathbf{W}}_2[:, j] (\hat{\mathbf{W}}_1[j, :]x + C) + \mathbf{b} - C \left( \sum_{i \in S} \hat{\mathbf{W}}_2[:, i] \right) \\ &= \sum_{\ell=1}^r \gamma_\ell \sigma(\alpha_\ell x + \beta_\ell) + \hat{\mathbf{W}}_2 \hat{\mathbf{W}}_1 x + \mathbf{b} = \sum_{\ell=1}^r \gamma_\ell \sigma(\alpha_\ell x + \beta_\ell) + \mathbf{A}x + \mathbf{b} = f. \quad \square \end{aligned}$$

*Proof of Lemma C.6.* In this proof, we define  $\Omega_\delta^\circ = (-B + \delta, B - \delta)^{N_0}, 0 < \delta < B$ . The choice of  $\delta$  is not important in this proof (any  $0 < \delta < B$  will do).

The proof of this lemma revolves around the following idea: We will construct a sequence of functions  $\{f^k\}_{k \in \mathbb{N}}$  such that, for  $k$  large enough,  $f^k$  has the following analytical form:

$$f^k(x) = \sum_{\ell=1}^r \gamma_\ell \sigma(\alpha_\ell x + \beta_\ell) + \mathbf{A}^k x + \mathbf{b}^k, \quad \forall x \in \Omega_\delta^\circ \quad (30)$$

and  $\lim_{k \rightarrow \infty} f^k(x) = f(x) \quad \forall x \in \Omega \setminus (\cup_{\ell=1}^r H_\ell)$  (or equivalently  $f^k$  converges pointwise to  $f$  on  $\Omega \setminus (\cup_{\ell=1}^r H_\ell)$ ) and  $\mathbf{A}^k$  admits a factorization into two factors  $\mathbf{A}^k = \mathbf{X}^k \mathbf{Y}^k$  satisfying  $\text{supp}(\mathbf{X}^k) \subseteq I_2[:, S], \text{supp}(\mathbf{Y}^k) \subseteq I_1[S, :]$ , so that  $\mathbf{A}^k \in \mathcal{L}_{\mathbf{I}'}$ . Comparing Equation (22) and Equation (30), we deduce that the sequence of affine functions  $\mathbf{A}^k x + \mathbf{b}^k$  converges pointwise to the affine function  $\mathbf{A}x + \mathbf{b}$  on the open set  $\Omega_\delta^\circ \setminus (\cup_{\ell=1}^r H_\ell)$ . Therefore,  $\lim_{k \rightarrow \infty} \mathbf{A}^k = \mathbf{A}$  by Lemma C.7 hence the conclusion.

888 The rest of this proof is devoted to the construction of  $f^k = \mathcal{R}_{\tilde{\theta}^k}$  where  $\tilde{\theta}^k \in \mathcal{N}_{\mathbf{N}}$  are parameters  
 889 of a neural network of the same dimension as those in  $\mathcal{N}_{\mathbf{I}}$  but only *partially* satisfying the support  
 890 constraint **I**. To guarantee that  $f^k$  converges pointwise to  $f$ , we construct  $\tilde{\theta}^k$  based on  $\theta^k$  and harness  
 891 their relation.

892 **Choice of parameters.** We set  $\tilde{\theta}^k = \{(\tilde{\mathbf{W}}_i^k, \tilde{\mathbf{b}}_i^k)_{i=1}^2\} \in \mathcal{N}_{\mathbf{N}}$  where  $\tilde{\mathbf{W}}_2^k \in \mathbb{R}^{N_2 \times N_1}$ ,  $\tilde{\mathbf{W}}_1^k \in$   
 893  $\mathbb{R}^{N_1 \times N_0}$  are defined as follows, where we use  $C^k := \sup_{x \in \Omega} \|\mathbf{W}_1^k x\|_{\infty}$ :

- 894 • For inactive neurons  $i \in \bar{J}$ , we simply set  $(\tilde{\mathbf{W}}_1^k[:, i], \tilde{\mathbf{W}}_2^k[:, i], \tilde{\mathbf{b}}_1^k[i]) = (\mathbf{W}_1^k[:, i], \mathbf{W}_2^k[:, i], \mathbf{b}_1^k[i])$ .
- For each equivalence class of active neurons  $1 \leq \ell \leq r$ , we choose some  $j_{\ell} \in J_{\ell}^+$  (note that  $J_{\ell}^+$  is non-empty due to Definition **C.1**) and set the parameters  $(\tilde{\mathbf{W}}_2^k[:, i], \tilde{\mathbf{W}}_1^k[i, :], \mathbf{b}_1^k[i]), i \in J_{\ell}$  as:

$$(\tilde{\mathbf{W}}_1^k[i, :], \tilde{\mathbf{W}}_2^k[:, i], \tilde{\mathbf{b}}_1^k[i]) = \begin{cases} (\mathbf{W}_1^k[i, :], \mathbf{W}_2^k[:, i], C^k), & \forall j \in J_{\ell}^- \\ (\mathbf{W}_1^k[i, :], \mathbf{0}, C^k), & \forall i \in J_{\ell}^+ \setminus \{j_{\ell}\} \\ (\alpha_{\ell}, \gamma_{\ell}, \beta_{\ell}), & i = j_{\ell} \end{cases} \quad (31)$$

895 For  $i \in J_{\ell} \setminus \{j_{\ell}\}$ , we clearly have:  $\text{supp}(\tilde{\mathbf{W}}_1^k[i, :]) \subseteq I_1[i, :]$  and  $\text{supp}(\tilde{\mathbf{W}}_2^k[:, i]) \subseteq I_2[:, i]$ . The  
 896  $j_{\ell}$ -th column of  $\tilde{\mathbf{W}}_2^k$  is the only one that does not necessarily satisfy the support constraint, as  
 897  $\text{supp}(\gamma_{\ell}) \not\subseteq I_2[:, j_{\ell}]$  in general.

- Finally, the output bias  $\mathbf{b}_2^k$  is set as:

$$\tilde{\mathbf{b}}_2^k := \mathbf{b}_2^k + \underbrace{\sum_{\ell=1}^r \sum_{i \in J_{\ell}^-} (\mathbf{b}_1^k[i] - C^k) \mathbf{W}_2^k[:, i]}_{=: \xi_{\ell}^k} \quad (32)$$

**Proof that  $f^k := \mathcal{R}_{\tilde{\theta}^k}$  converges pointwise to  $f$  on  $\Omega \setminus (\cup_{\ell=1}^r H_{\ell})$ .** We introduce notations analog  
 to Definition **C.2**: for every  $x \in \mathbb{R}^{N_0}$  we define:

$$\tilde{h}_i^k(x) = \tilde{\mathbf{W}}_2^k[:, i] \sigma(\tilde{\mathbf{W}}_1^k[i, :]x + \tilde{\mathbf{b}}_1^k[i]), \quad i = 1, \dots, N_1; \quad \tilde{g}_{\ell}^k(x) = \sum_{i \in J_{\ell}} \tilde{h}_i^k(x), \quad \ell = 1, \dots, r$$

898 By construction

$$\tilde{h}_i^k = h_i^k, \quad \forall i \in \bar{J}, \forall k, \quad (33)$$

899 and we further explicit the form of  $\tilde{h}_i^k, i \in J_{\ell}$  for  $x \in \Omega$  (but *not* on  $\mathbb{R}^{N_0}$ ) as:

$$\tilde{h}_i^k(x) = \begin{cases} \mathbf{W}_2^k[:, i] (\mathbf{W}_1^k[i, :]x + C^k), & \forall i \in J_{\ell}^- \\ 0, & \forall i \in J_{\ell}^+ \setminus \{j_{\ell}\}, \\ \gamma_{\ell} \sigma(\alpha_{\ell} x + \beta_{\ell}), & i = j_{\ell} \end{cases} \quad (34)$$

900 We justify our formula in Equation **(34)** as follow:

- 901 1. For  $i \in J_{\ell}^-$ : since  $C^k = \sup_{x \in \Omega} \|\mathbf{W}_1^k x\|_{\infty}$  by construction,  $\tilde{\mathbf{W}}_1^k[i, :]x + \mathbf{b}_1^k[i] = \mathbf{W}_1^k[i, :]x +$   
 902  $\mathbf{b}_1^k[i] \geq 0$ . The activation  $\sigma$  acts simply as an identity function.
- 903 2. For  $i \in J_{\ell}^+$ : Because we choose  $\tilde{\mathbf{W}}_2^k[:, i] = \mathbf{0}$ .
- 904 3. For  $i = j_{\ell}$ : Obvious due to the construction in Equation **(31)**.

905 Given  $x \in \Omega \setminus (\cup_{\ell=1}^r H_{\ell})$ , we now prove that this construction ensures that for each  $\ell \in \{1, \dots, r\}$

$$\lim_{k \rightarrow \infty} (\tilde{g}_{\ell}^k(x) - g_{\ell}^k(x) + \xi_{\ell}^k) = 0. \quad (35)$$

This will imply the claimed poinwise convergence since

$$\begin{aligned}
\lim_{k \rightarrow \infty} f^k(x) &= \lim_{k \rightarrow \infty} R_{\tilde{\theta}^k}(x) = \lim_{k \rightarrow \infty} \left( \sum_{i \in \bar{J}} \tilde{h}_i^k(x) + \sum_{\ell=1}^r \tilde{g}_\ell^k(x) + \tilde{\mathbf{b}}_2^k \right) \\
&\stackrel{(33) \& (35)}{=} \lim_{k \rightarrow \infty} \left( \sum_{i \in \bar{J}} h_i^k(x) + \sum_{\ell=1}^r g_\ell^k(x) - \sum_{\ell=1}^r \xi_\ell^k + \tilde{\mathbf{b}}_2^k \right) \\
&\stackrel{(32)}{=} \lim_{k \rightarrow \infty} \left( \sum_{i \in \bar{J}} h_i^k(x) + \sum_{\ell=1}^r g_\ell^k(x) + \mathbf{b}_2^k \right) = \lim_{k \rightarrow \infty} R_{\theta^k}(x) = f(x).
\end{aligned}$$

906 To establish (35), observe that as  $x \in \Omega \setminus (\cup_{\ell=1}^r H_\ell)$  we have  $x \notin H_\ell$ . We thus distinguish two cases:  
 907 **Case**  $x \in H_\ell^-$ .

908 Using (31) we show below that for  $k$  large enough and  $x \in H_\ell^-$ , we have

$$\tilde{h}_i^k(x) - h_i^k(x) = \begin{cases} (C^k - \mathbf{b}_1^k[i]) \mathbf{W}_2^k[:, i], & i \in J_\ell^- \\ 0, & i \in J_\ell^+ \end{cases} \quad (36)$$

and thus

$$\tilde{g}_\ell^k(x) - g_\ell^k(x) + \xi_\ell^k = \sum_{i \in J_\ell} (\tilde{h}_i^k(x) - h_i^k(x)) + \xi_\ell^k = \sum_{i \in J_\ell^-} (C^k - \mathbf{b}_1^k[i]) \mathbf{W}_2^k[:, i] + \xi_\ell^k = 0.$$

909 We indeed obtain (36) as follows. Since  $x \in H_\ell^-$ ,  $\alpha_\ell x + \beta_\ell < 0$ , i.e.,  $-\alpha_\ell x - \beta_\ell > 0$ . Therefore,  
 910 given the definitions of  $J_\ell^\pm$  (cf Definition C.1) we have:

• For  $i \in J_\ell^-$ :  $\lim_{k \rightarrow \infty} (\mathbf{W}_1^k[i, :] \mathbf{b}_1^k[i]) = -(\alpha_\ell, \beta_\ell)$ , hence for  $k$  large enough, we have  $\mathbf{W}_1^k[i, :]x + \mathbf{b}_1^k[i] > 0$  so that  $\sigma(\mathbf{W}_1^k[i, :]x + \mathbf{b}_1^k[i]) = \mathbf{W}_1^k[i, :]x + \mathbf{b}_1^k[i]$  and, as expressed in (34):

$$\tilde{h}_i^k(x) - h_i^k(x) \stackrel{(34)}{=} \mathbf{W}_2^k[:, i] (\mathbf{W}_1^k[i, :]x + C^k) - \mathbf{W}_2^k[:, i] (\mathbf{W}_1^k[i, :]x + \mathbf{b}_1^k[i]) = (C^k - \mathbf{b}_1^k[i]) \mathbf{W}_2^k[:, i].$$

911 • For  $i \in J_\ell^+$ : similarly, we have  $\mathbf{W}_1^k[i, :]x + \mathbf{b}_1^k[i] < 0$  for  $k$  large enough. Therefore,  $h_i^k(x) = 0$   
 912 for  $k$  large enough. The fact that we also have  $\tilde{h}_i^k(x) = 0$  is immediate from Equation (34) if  $i \neq j_\ell$ ,  
 913 and for  $i = j_\ell$  we also get from Equation (34) that  $\tilde{h}_i^k(x) = \gamma_\ell \sigma(\alpha_\ell x + \beta_\ell) = 0$  since  $\alpha_\ell x + \beta_\ell < 0$ .

914 **Case**  $x \in H_\ell^+$ . An analog to Equation (36) for  $x \in H_\ell^+$  is

$$\tilde{h}_i^k(x) - h_i^k(x) = \begin{cases} \mathbf{W}_2^k[:, i] (\mathbf{W}_1^k[i, :]x + C^k), & i \in J_\ell^- \\ -\mathbf{W}_2^k[:, i] (\mathbf{W}_1^k[i, :]x + \mathbf{b}_1^k[i]), & i \in J_\ell^+ \setminus \{j\} \\ \gamma_\ell (\alpha_\ell x + \beta_\ell) - \mathbf{W}_2^k[:, i] (\mathbf{W}_1^k[i, :]x + \mathbf{b}_1^k[i]), & i = j \end{cases} \quad (37)$$

915 We establish it before concluding for this case.

• For  $i \in J_\ell^-$ : by a reasoning analog to the case  $x \in H_\ell^-$ , we deduce that for  $k$  large enough

$$\tilde{h}_i^k(x) - h_i^k(x) \stackrel{(34)}{=} \mathbf{W}_2^k[:, i] (\mathbf{W}_1^k[i, :]x + C^k).$$

916 • For  $i \in J_\ell^+$ : a similar reasoning yields  $h_i^k(x) = \mathbf{W}_2^k[:, i] (\mathbf{W}_1^k[i, :]x + \mathbf{b}_1^k[i])$  for  $k$  large enough,  
 917 while Equation (34) yields  $\tilde{h}_{j_\ell}^k(x) = \gamma_\ell \sigma(\alpha_\ell x + \beta_\ell) = \gamma_\ell (\alpha_\ell x + \beta_\ell)$  (since  $\alpha_\ell x + \beta_\ell > 0$  as  $x \in H_\ell^+$ )  
 918 and  $\tilde{h}_i^k(x) = 0$  if  $i \neq j_\ell$ .

Using (37) we obtain for  $k$  large enough

$$\begin{aligned}
\tilde{g}_\ell^k(x) - g_\ell^k(x) + \xi_\ell^k &= \sum_{i \in J_\ell} \left( \tilde{h}_i^k(x) - h_i^k(x) \right) + \xi_\ell^k \\
&= \sum_{i \in J_\ell^-} \mathbf{W}_2^k[:, i] (\mathbf{W}_1^k[i, :]x + C^k) - \sum_{i \in J_\ell^+} \mathbf{W}_2^k[:, i] (\mathbf{W}_1^k[i, :]x + \mathbf{b}_1^k[i]) + \gamma_\ell(\alpha_\ell x + \beta_\ell) + \xi_\ell^k \\
&\stackrel{(32)}{=} \left( \sum_{i \in J_\ell^-} \mathbf{W}_2^k[:, i] \mathbf{W}_1^k[i, :] - \sum_{j \in J_\ell^+} \mathbf{W}_2^k[:, j] \mathbf{W}_1^k[j, :] + \gamma_\ell \alpha_\ell \right) x \\
&\quad + \underbrace{\left( \xi_\ell^k + \sum_{i \in J_\ell^-} \mathbf{W}_2^k[:, i] C^k - \sum_{i \in J_\ell^+} \mathbf{W}_2^k[:, i] \mathbf{b}_1^k[i] + \gamma_\ell \beta_\ell \right)}_{\sum_{i \in J_\ell^-} \mathbf{W}_2^k[:, i] \mathbf{b}_1^k[i]}
\end{aligned}$$

919 where in the last line we used the expression of  $\xi_\ell^k$  from (32). Due to Equations (23) and (24) it  
920 follows that  $\lim_{k \rightarrow \infty} \tilde{g}_\ell^k(x) - g_\ell^k(x) + \xi_\ell^k = 0, \forall x \in H_\ell^+$ .

921 Thus combining both cases, we conclude that  $\lim_{k \rightarrow \infty} \tilde{g}_\ell^k(x) - g_\ell^k(x) + \xi_\ell^k = 0, \forall x \notin H_\ell$ , as desired.

**Proof of the expression (30) with  $\mathbf{A}^k \in \mathcal{L}_I$  for large enough  $k$ .** From (34), we first deduce that

$$f^k(x) = \sum_{i=1}^{N_1} \tilde{h}_i^k(x) + \tilde{\mathbf{b}}_2^k = \sum_{\ell=1}^r \gamma_\ell \sigma(\alpha_\ell x + \beta_\ell) + \sum_{i \in S} \tilde{h}_i^k(x) + \tilde{\mathbf{b}}_2^k, \quad \forall x \in \mathbb{R}^{N_0}.$$

where we recall that  $S := \bar{J} \cup (\cup_{1 \leq \ell \leq r} J_\ell^-)$ . There only remains to show that, for  $k$  large enough, we have  $\sum_{i \in S} \tilde{h}_i^k(x) = \mathbf{A}^k x + \mathbf{b}^k$  for every  $x$  in the restricted domain  $\Omega_\delta^\circ$ , where  $\mathbf{A}^k \in \mathcal{L}_I$  and  $\mathbf{b}^k \in \mathbb{R}^{N_2}$ . Note that for  $i \in J_\ell$ , our construction assures that  $\tilde{h}_i^k$  is affine on  $\Omega$ . Moreover, in the restricted domain  $\Omega_\delta^\circ$ , for  $k \geq \kappa_\delta$  large enough,  $\tilde{h}_i^k, i \in \bar{J}$  also behave like affine functions (cf Lemma C.5). Therefore,

$$\sum_{i \in S} \tilde{h}_i^k(x) = \left( \sum_{i \in S} \delta_i^k \tilde{\mathbf{W}}_2^k[:, i] \tilde{\mathbf{W}}_1^k[i, :] \right) x + \mathbf{c}^k, \quad \forall x \in \Omega_\delta^\circ, k \geq \kappa_\delta$$

for some vector  $\mathbf{c}^k$  and binary scalars  $\delta_i^k$ . In fact,  $\delta_i^k = 0$  if  $i \in \bar{J}^- := \{j \in \bar{J} \mid \mathbf{W}_1^k[j, :]x + \mathbf{b}_1^k[j] \leq 0, \forall x \in \Omega\}$  and  $\delta_i^k = 1$  otherwise. Thus, one chooses  $\mathbf{A}^k = \sum_{i \in S} \delta_i^k \tilde{\mathbf{W}}_2^k[:, i] \tilde{\mathbf{W}}_1^k[i, :]$ ,  $\mathbf{b}^k = \mathbf{c}^k$  and the construction is complete. This construction allows us to write  $\mathbf{A}^k = \tilde{\mathbf{W}}_2^k \hat{\mathbf{W}}_1^k$  with:

$$\begin{aligned}
\hat{\mathbf{W}}_1^k &= \tilde{\mathbf{W}}_1^k[S, :] \\
\hat{\mathbf{W}}_2^k &= \tilde{\mathbf{W}}_2^k[:, S] \text{diag}(\{\nu_i^k \mid i = 1, \dots, N_1\})
\end{aligned}$$

922 where  $\text{diag}(\{\nu_i^k \mid i = 1, \dots, N_1\}) \in \mathbb{R}^{N_1 \times N_1}$  is a diagonal matrix,  $\nu_i^k = \delta_i^k$  for  $i \in S$  and 0  
923 otherwise. It is also evident that  $\text{supp}(\hat{\mathbf{W}}_2^k[:, S]) \subseteq I_2[:, S]$ ,  $\text{supp}(\hat{\mathbf{W}}_1^k[S, :]) \subseteq I_1[S, :]$ . (since the  
924 multiplication with a diagonal matrix does not increase the support of a matrix). This concludes the  
925 proof.  $\square$

### 926 C.3 Proof for Corollary 4.2

927 *Proof.* The proof is inductive on the number of hidden neurons  $N_1$ :

1. Basic case  $N_1 = 1$ : Consider  $\theta := \{(\mathbf{W}_i, \mathbf{b}_i)_{i=1}^2\} \in \mathcal{N}_I$ , the function  $\mathcal{R}_\theta$  has the form:

$$\mathcal{R}_\theta(x) = \mathbf{w}_2 \sigma(\mathbf{w}_1^\top x + \mathbf{b}_1) + \mathbf{b}_2$$

928 where  $\mathbf{w}_1 = \mathbf{W}_1[1, :] \in \mathbb{R}^{N_0}$ ,  $\mathbf{w}_2 = \mathbf{W}_2[1, 1] \in \mathbb{R}$ . There are two possibilities:

929 (a)  $I_2 = \emptyset$ : then  $\mathbf{w}_2 = 0$ ,  $\mathcal{F}_I$  is simply a set of constant functions on  $\Omega$ , which is closed.

930 (b)  $I_2 = \{(1, 1)\}$ : We have  $I_2 = \mathbf{1}_{1 \times N_1}$ , which makes the first assumption of Theorem 4.2 satisfied.  
 931 To check that the second assumption of Theorem 4.2 also holds, we consider all the possible  
 932 non-empty subsets  $S$  of  $\llbracket 1 \rrbracket$ : there is only one non-empty subset of  $I_2$ , which is  $S = \llbracket 1 \rrbracket$ . In  
 933 that case,  $\mathcal{L}_{I_S} = \{\mathbf{W} \in \mathbb{R}^{1 \times N_0} \mid \text{supp}(\mathbf{W}) \subseteq I_1\}$ , which is closed (since  $\mathcal{L}_{I_S}$  is isomorphic to  
 934  $\mathbb{R}^{|I_1|}$ ). The result thus follows using Theorem 4.2

935 2. Assume the conclusion of the theorem holds for all  $1 \leq N_1 \leq k$  (and any  $N_0 \geq 1$ ). We need to  
 936 prove the result for  $N_1 = k + 1$ . Define  $H = \{i \mid I_2[1, i] = 1\}$  the set of hidden neurons that are  
 937 allowed to be connected to the output via a nonzero weight. Consider two cases:

- 938 (a) If  $|H| \leq k$ , we have  $\mathcal{F}_I = \mathcal{F}_{I_H}$ , which is closed due to the induction hypothesis.  
 939 (b) If  $H = \llbracket k + 1 \rrbracket$ , we can apply Theorem 4.2. Indeed, since  $I_2 = \mathbf{1}_{1 \times N_1}$ , the first condition of  
 940 Theorem 4.2 is satisfied. In addition, for any non-empty  $S \subseteq \llbracket N_1 \rrbracket$ , define  $\mathcal{H} := \cup_{i \in S} I[i, :] \subseteq$   
 941  $\llbracket N_0 \rrbracket$  the union of row supports of  $I_1[S, :]$ . It is easy to verify that  $\mathcal{L}_{I_S}$  is isomorphic to  $\mathbb{R}^{|\mathcal{H}|}$ ,  
 942 which is closed. As such, Theorem 4.2 can be applied.  $\square$

#### 943 C.4 Other technical lemmas

944 **Lemma C.7** (Convergence of affine function). *Let  $\Omega$  be a non-empty interior subset  $\mathbb{R}^n$ . If the*  
 945 *sequence  $\{f^k\}_{k \in \mathbb{N}}, f^k : \mathbb{R}^n \mapsto \mathbb{R}^m : x \mapsto \mathbf{A}^k x + \mathbf{b}^k$  where  $\mathbf{A}^k \in \mathbb{R}^{m \times n}, \mathbf{b}^k \in \mathbb{R}^m$  converges*  
 946 *pointwise to a function  $f$  on  $\Omega$ , then  $f$  is affine (i.e.,  $f = \mathbf{A}x + \mathbf{b}$  for some  $\mathbf{A} \in \mathbb{R}^{m \times n}, \mathbf{b} \in \mathbb{R}^m$ ).*  
 947 *Moreover,  $\lim_{k \rightarrow \infty} \mathbf{A}^k = \mathbf{A}$  and  $\lim_{k \rightarrow \infty} \mathbf{b}^k = \mathbf{b}$ .*

*Proof.* Consider  $x_0 \in \Omega'$ , an open subset of  $\Omega$  ( $\Omega'$  exists since  $\Omega$  is a non-empty interior subset of  $\mathbb{R}^n$ ). Define  $g^k(x) = f^k(x) - f^k(x_0)$  and  $g(x) = f(x) - g(x_0)$ . The function  $g^k$  is linear and  $g^k$  converges pointwise to  $g$  on  $\Omega$  (and thus, on  $\Omega'$ ). We first prove that  $g$  is linear. Indeed, for any  $x, y \in \Omega, \alpha, \beta \in \mathbb{R}$  such that  $\alpha x + \beta y \in \Omega$ , we have:

$$\begin{aligned} g(\alpha x + \beta y) &= \lim_{k \rightarrow \infty} g^k(\alpha x + \beta y) \\ &= \lim_{k \rightarrow \infty} \alpha g^k(x) + \beta g^k(y) \\ &= \alpha \lim_{k \rightarrow \infty} g^k(x) + \beta \lim_{k \rightarrow \infty} g^k(y) \\ &= \alpha g(x) + \beta g(y) \end{aligned}$$

948 Therefore, there must exist  $\mathbf{A} \in \mathbb{R}^{m \times n}$  such that  $g(x) = \mathbf{A}x$ . Choosing  $\mathbf{b} := g(x_0)$ , we have  
 949  $f(x) = g(x) + g(x_0) = \mathbf{A}x + \mathbf{b}$ .

Moreover, since  $\Omega'$  is open, there exists a positive  $r$  such that the ball  $\mathcal{B}(x, r) \subseteq \Omega'$ . Choosing  $x_i = x_0 + (r/2)\mathbf{e}_i$  with  $\mathbf{e}_i$  the  $i$ th canonical vector, we have:

$$\lim_{k \rightarrow \infty} g^k(x_i) = \lim_{k \rightarrow \infty} (r/2)\mathbf{A}^k \mathbf{e}_i = (r/2)\mathbf{A} \mathbf{e}_i,$$

950 or, equivalently, the  $i$ th column of  $\mathbf{A}$  is the limit of the sequence generated by the  $i$ th column of  
 951  $\mathbf{A}^k$ . Repeating this argument for all  $1 \leq i \leq n$ , we have  $\lim_{k \rightarrow \infty} \mathbf{A}^k = \mathbf{A}$ . This also implies  
 952  $\lim_{k \rightarrow \infty} \mathbf{b}^k = \mathbf{b}$  immediately.  $\square$

#### 953 D Closedness does not imply the best approximation property

954 Since we couldn't find any source discussing the fact that closedness does not imply the BAP, we  
 955 provide an example to show this fact.

Consider  $C^0([-1, 1])$  the set of continuous functions on the interval  $[-1, 1]$ , equipped with the norm  $\sup \|f\|_\infty = \max_{x \in [-1, 1]} |f(x)|$ , and define  $S$ , the subset of all functions  $f \in C^0([-1, 1])$  such that:

$$\int_0^1 f dx - \int_{-1}^0 f dx = 1$$

956 It is easy to verify that  $S$  is closed. We show that the constant function  $f = 0$  does not have a  
 957 projection in  $S$  (i.e., a function  $g \in S$  such that  $\|f - g\|_\infty = \inf_{h \in S} \|f - h\|_\infty$ ).

958 First we observe that since  $f = 0$ , we have  $\|f - h\|_\infty = \|h\|_\infty$  for each  $h \in S$ , and we show that  
 959  $\inf_{h \in S} \|f - h\|_\infty \geq 1/2$ . Indeed, for  $h \in S$  we have:

$$1 = \int_0^1 h \, dx - \int_{-1}^0 h \, dx \leq \left| \int_0^1 h \, dx \right| + \left| \int_{-1}^0 h \, dx \right| \leq 2\|h\|_\infty = 2\|f - h\|_\infty. \quad (38)$$

Secondly, we show a sequence of  $\{h_n\}_{k \in \mathbb{N}}$  such that  $h_n \in S$  and  $\lim_{n \rightarrow \infty} \|h_n\|_\infty = 1/2$ . Consider the odd function  $h_n$  (i.e.  $h_n(x) = -h_n(-x)$ ) such that:

$$h_n(x) = \begin{cases} c_n, & x \in [1/n, 1] \\ nc_n x & x \in [0, 1/n) \end{cases}$$

where  $c_n = n/(2n - 1)$ . It is evident that  $h_n \in S$  because:

$$\begin{aligned} \int_0^1 h_n \, dx - \int_{-1}^0 h_n \, dx &= 2 \int_0^1 h_n \, dx = 2 \left( \int_0^{1/n} h_n \, dx + \int_{1/n}^1 h_n \, dx \right) \\ &= 2 \left( \frac{c_n}{2n} + \frac{c_n(n-1)}{n} \right) = \frac{c_n(2n-1)}{n} = 1 \end{aligned}$$

960 Moreover, we also have  $\lim_{n \rightarrow \infty} \|h_n\|_\infty = \lim_{n \rightarrow \infty} c_n = 1/2$ .

961 Finally, we show that  $1/2$  cannot be attained. By contradiction, assume that there exists  $g \in S$  such  
 962 that  $\|f - g\|_\infty = 1/2$ , i.e., as we have seen,  $\|g\|_\infty = 1/2$ . Using Equation (38), the equality will  
 963 only hold if  $g(x) = 1/2$  in  $[0, 1]$  and  $g(x) = -1/2$  in  $[-1, 0]$ . However,  $g$  is not continuous, a  
 964 contradiction.
